# Supplementary material
Source: PubMed Central journal article supplement (PMC2034218)

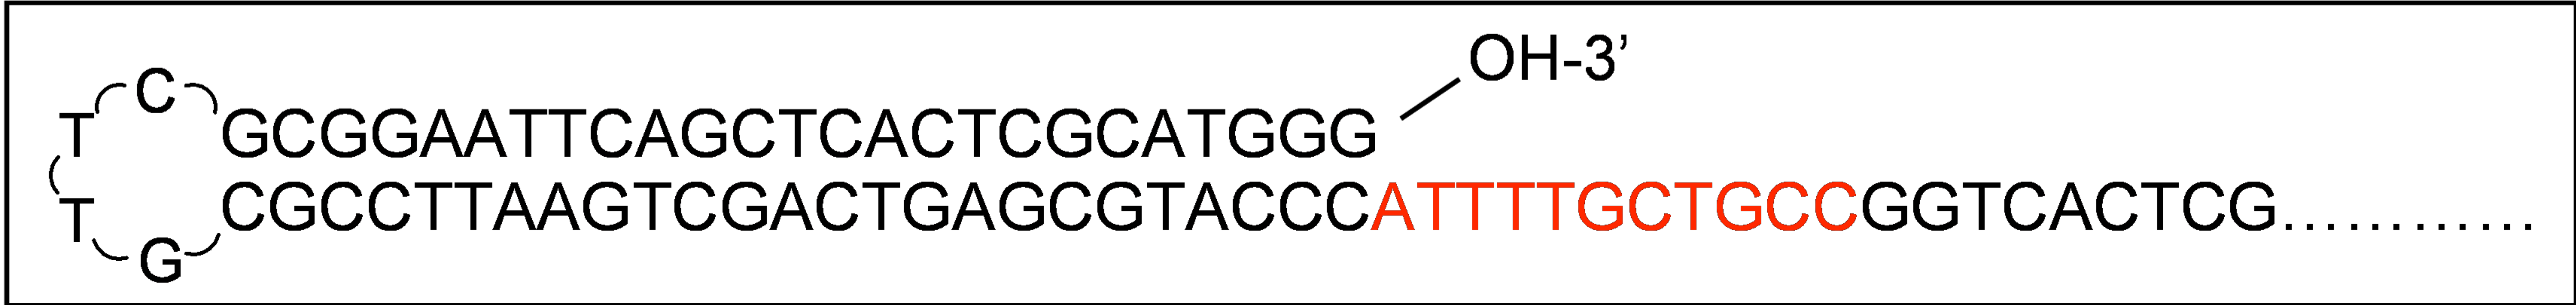

A. Terminator-pyrosequencing data for a PCR template (using four reversible terminators 3'-O-NB-dNTPs iteratively)

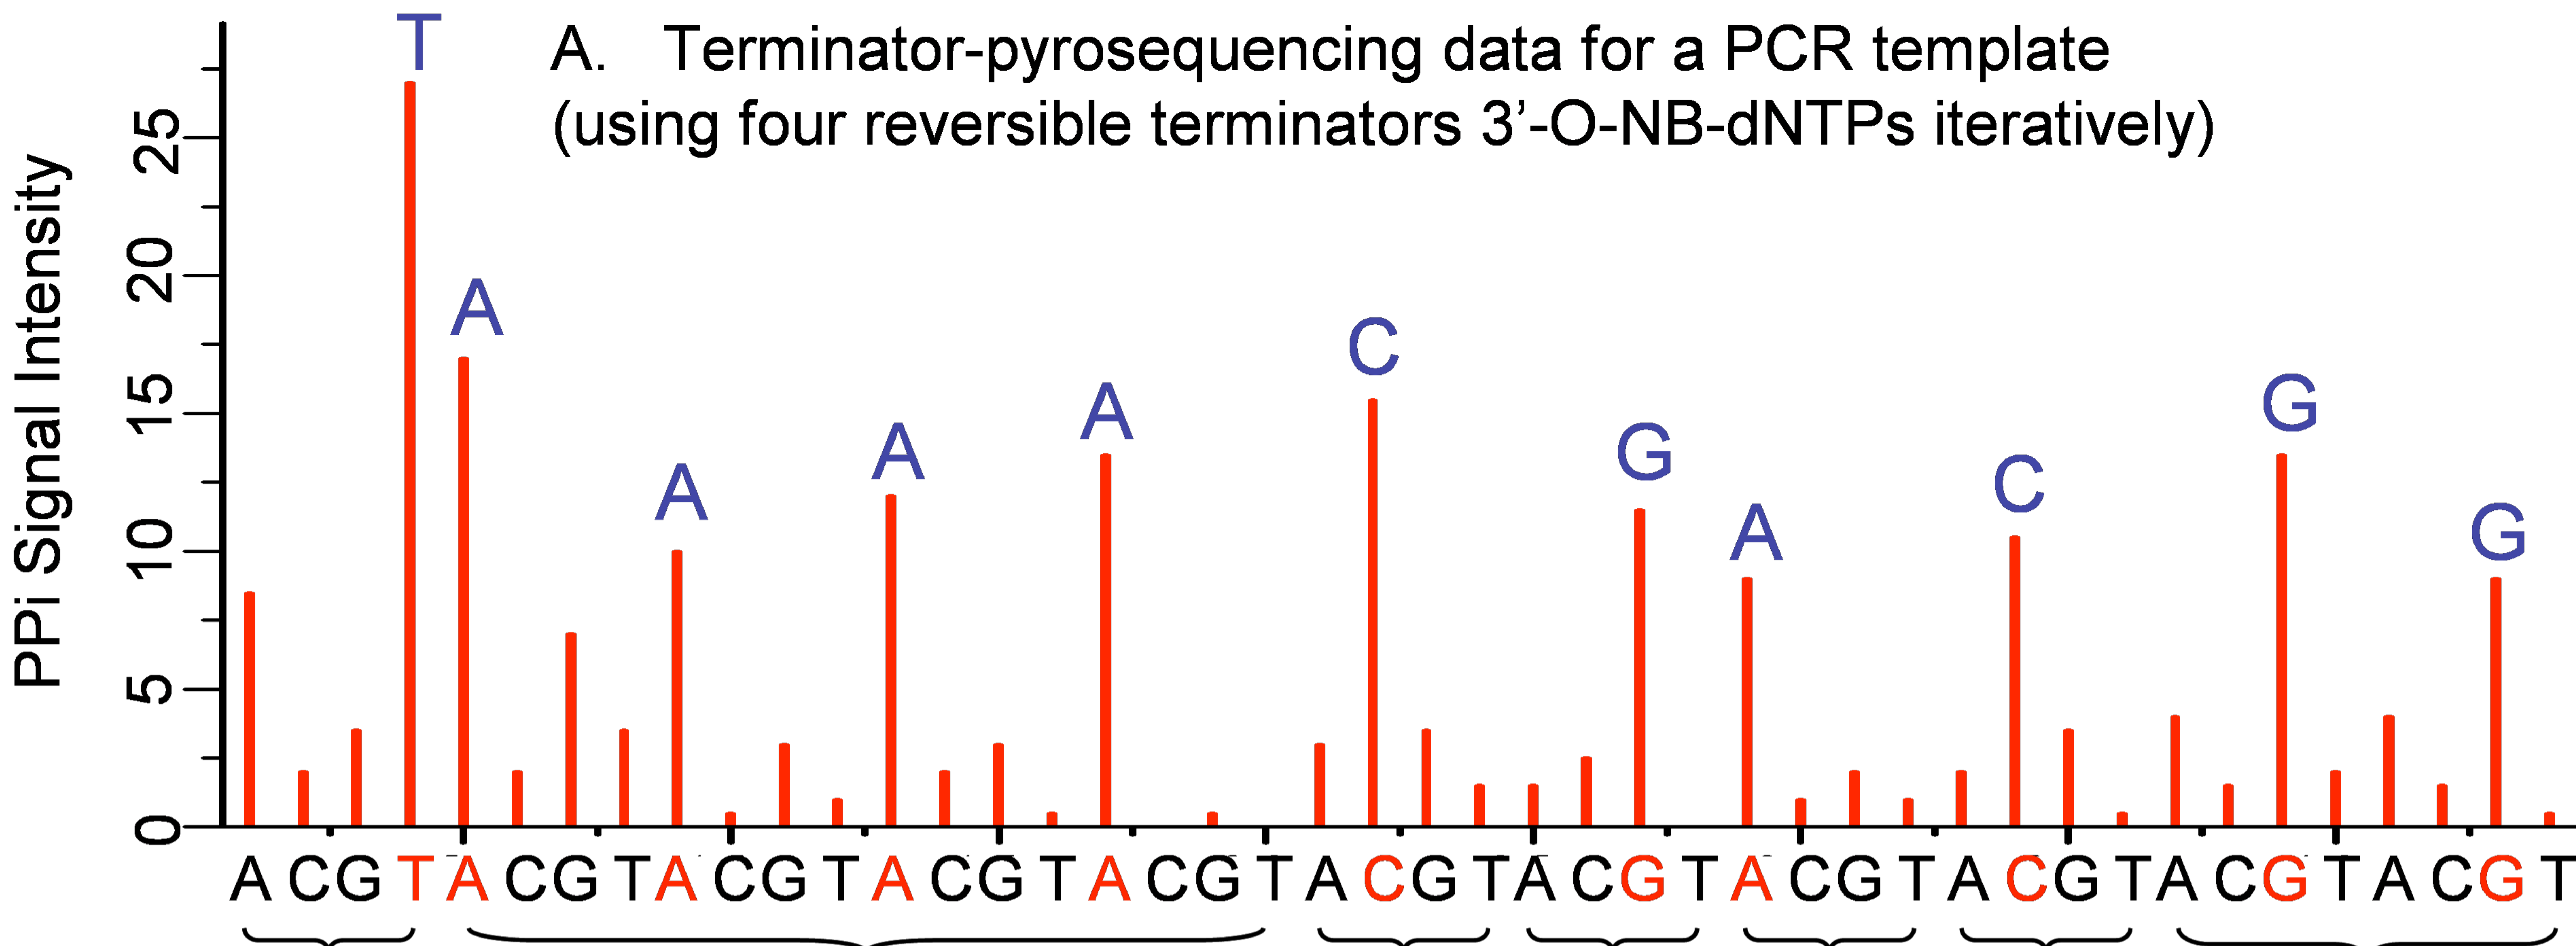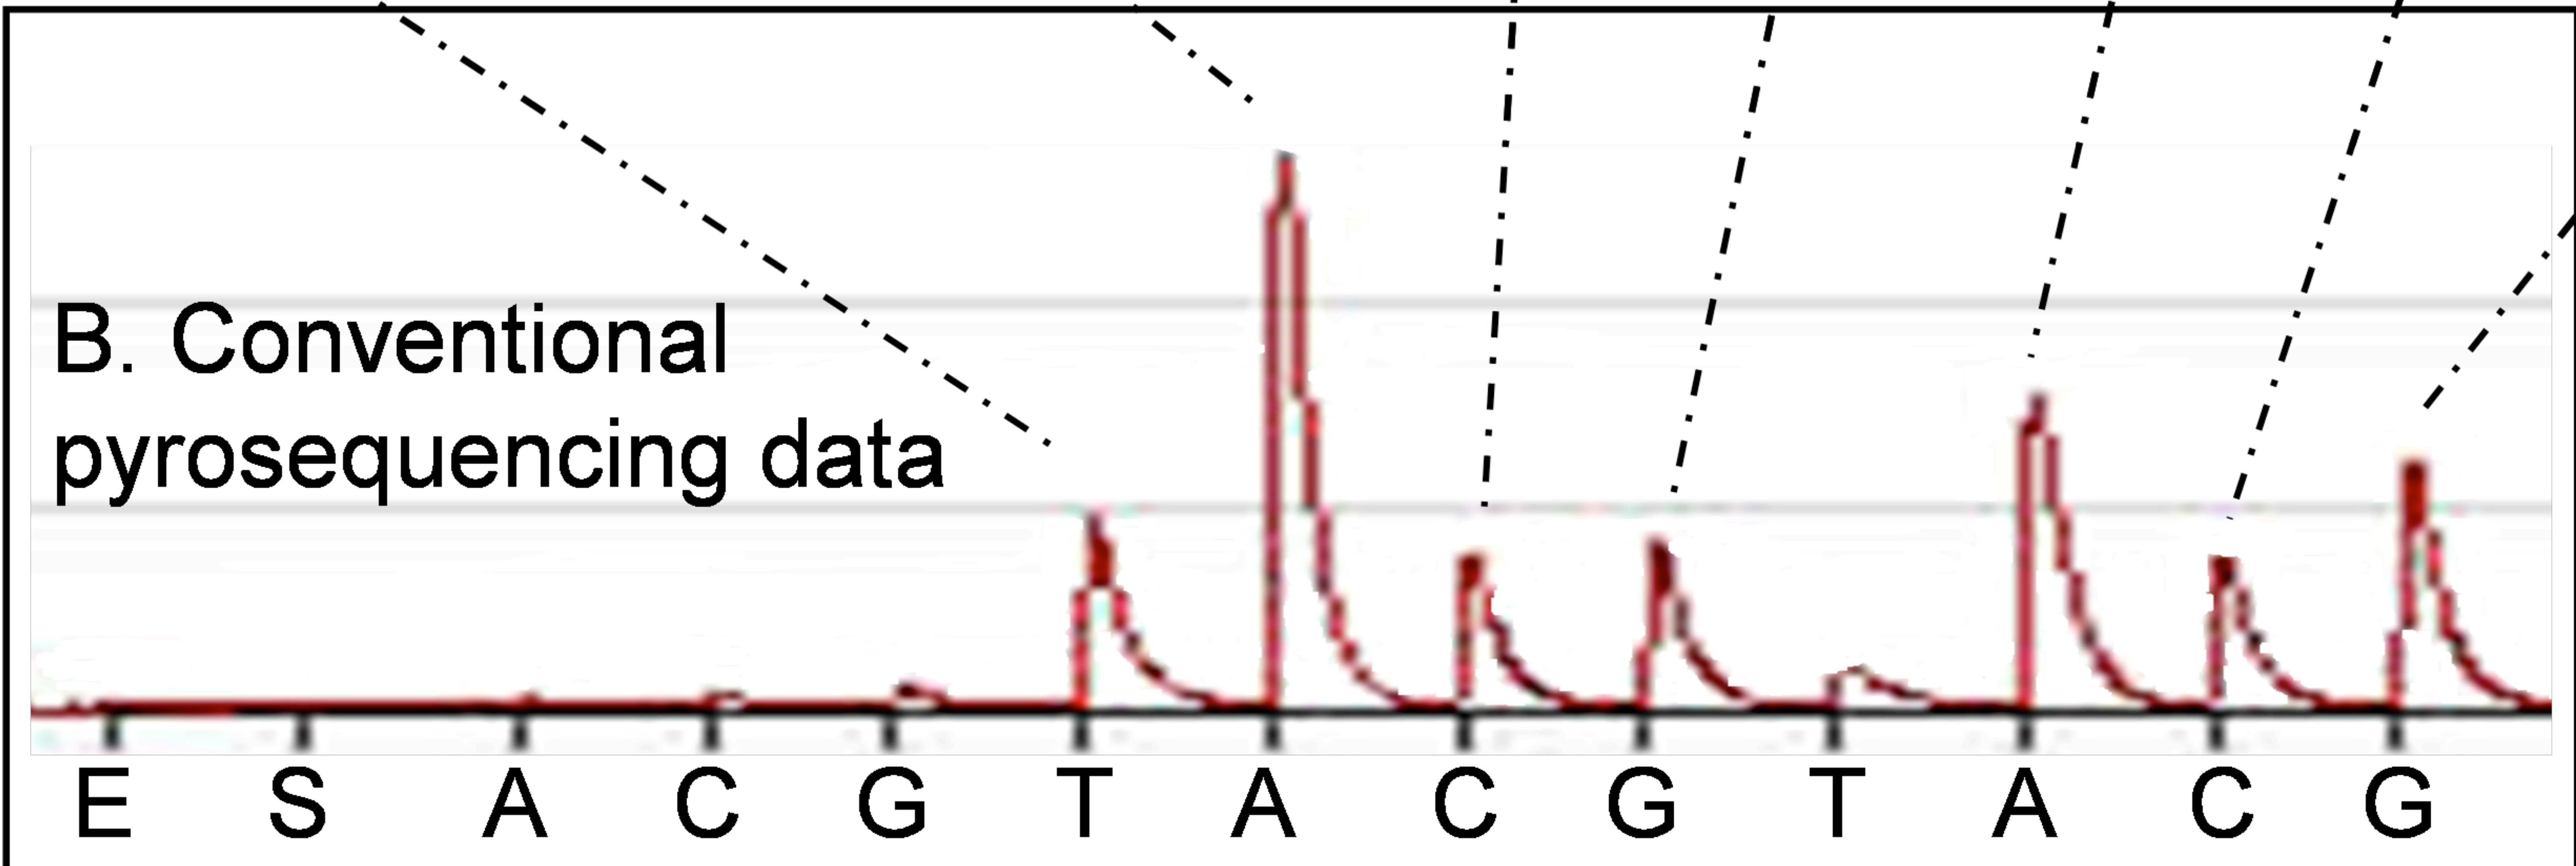

Supplement: pnas_0707495104_3.pdf [file pnas_0707495104_3.pdf]
