# Supplementary material
Source: PubMed Central journal article supplement (PMC2034218)

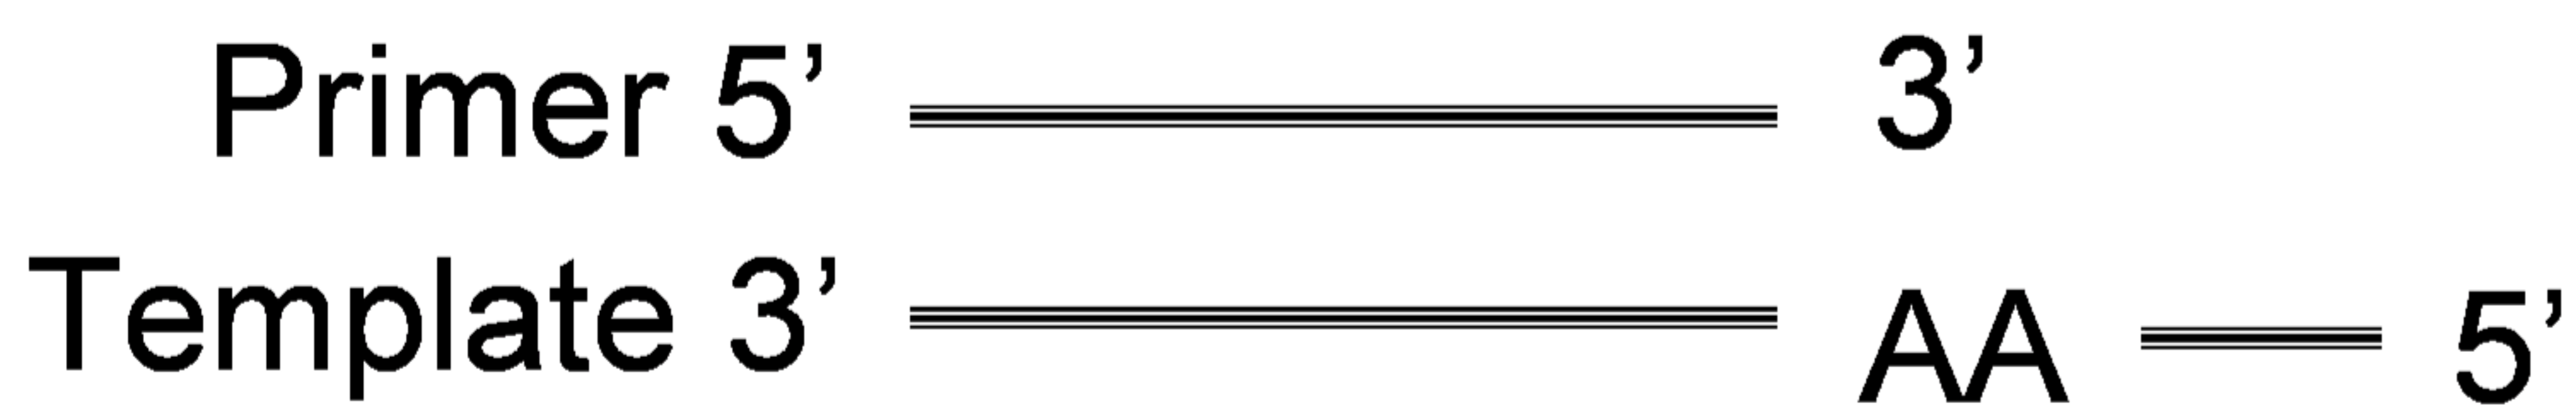

*Polymerase* 3'-O-NB-dTTP

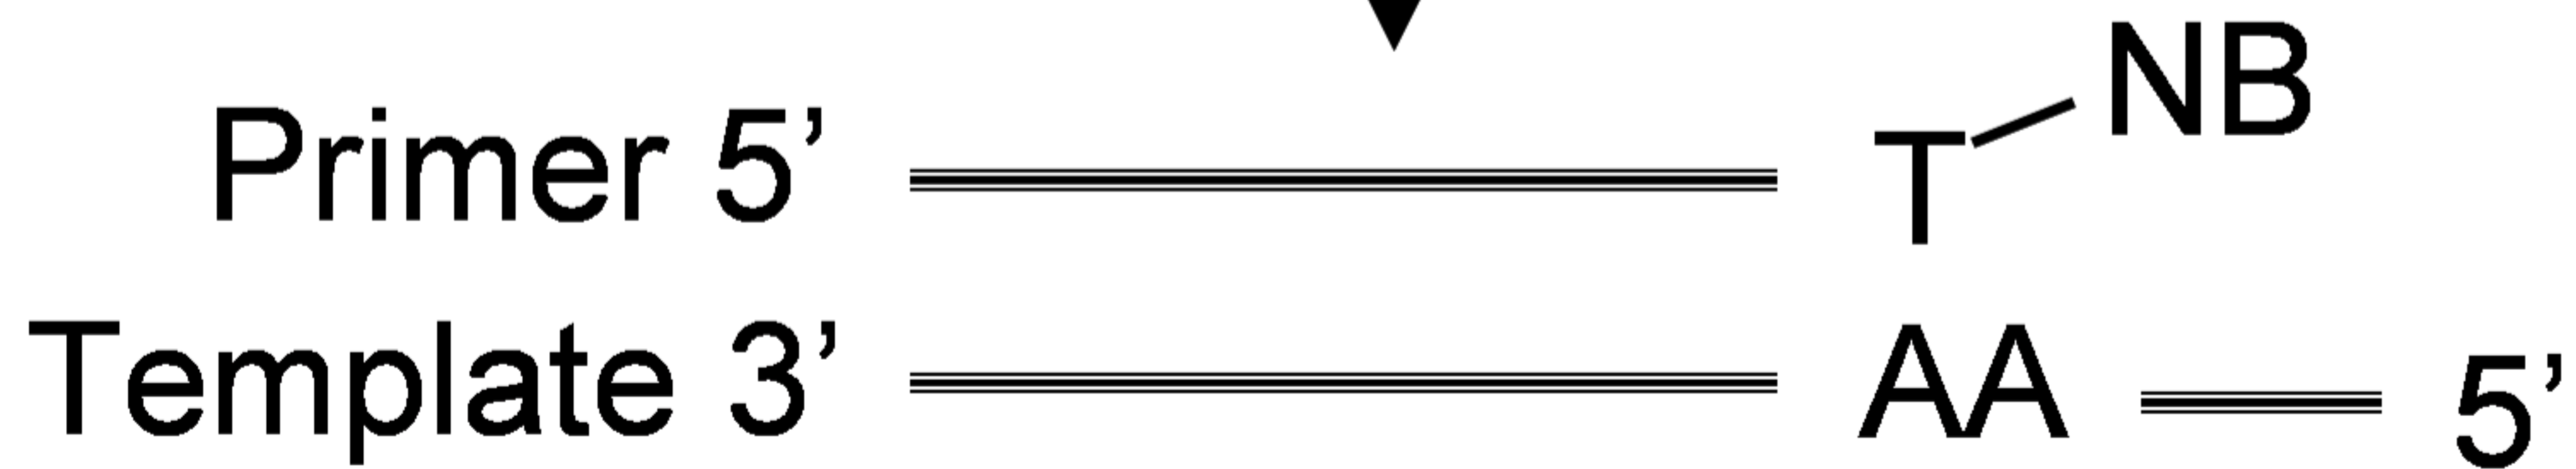

*Photocleavage*

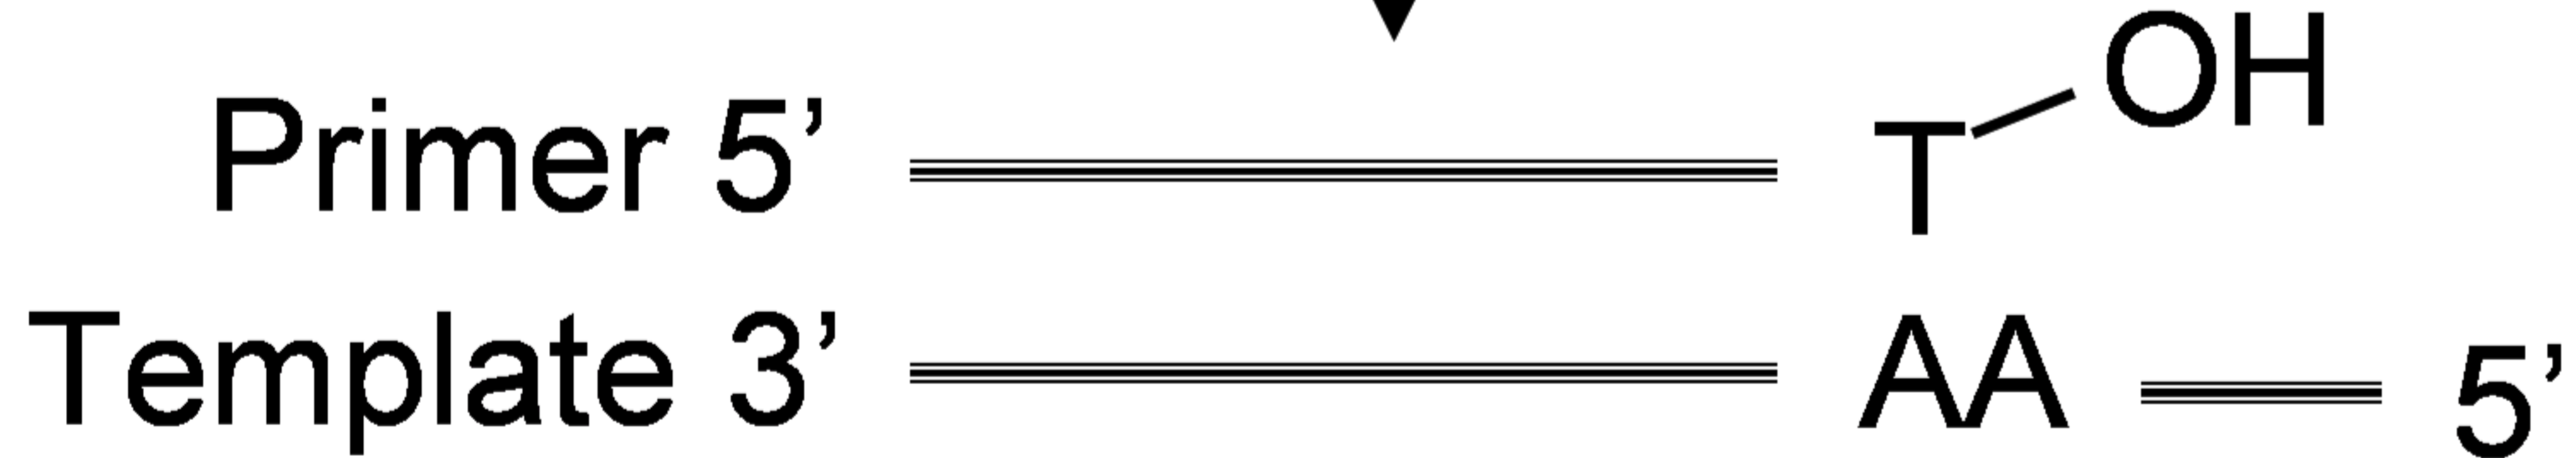

*Polymerase* 3'-O-NB-dTTP

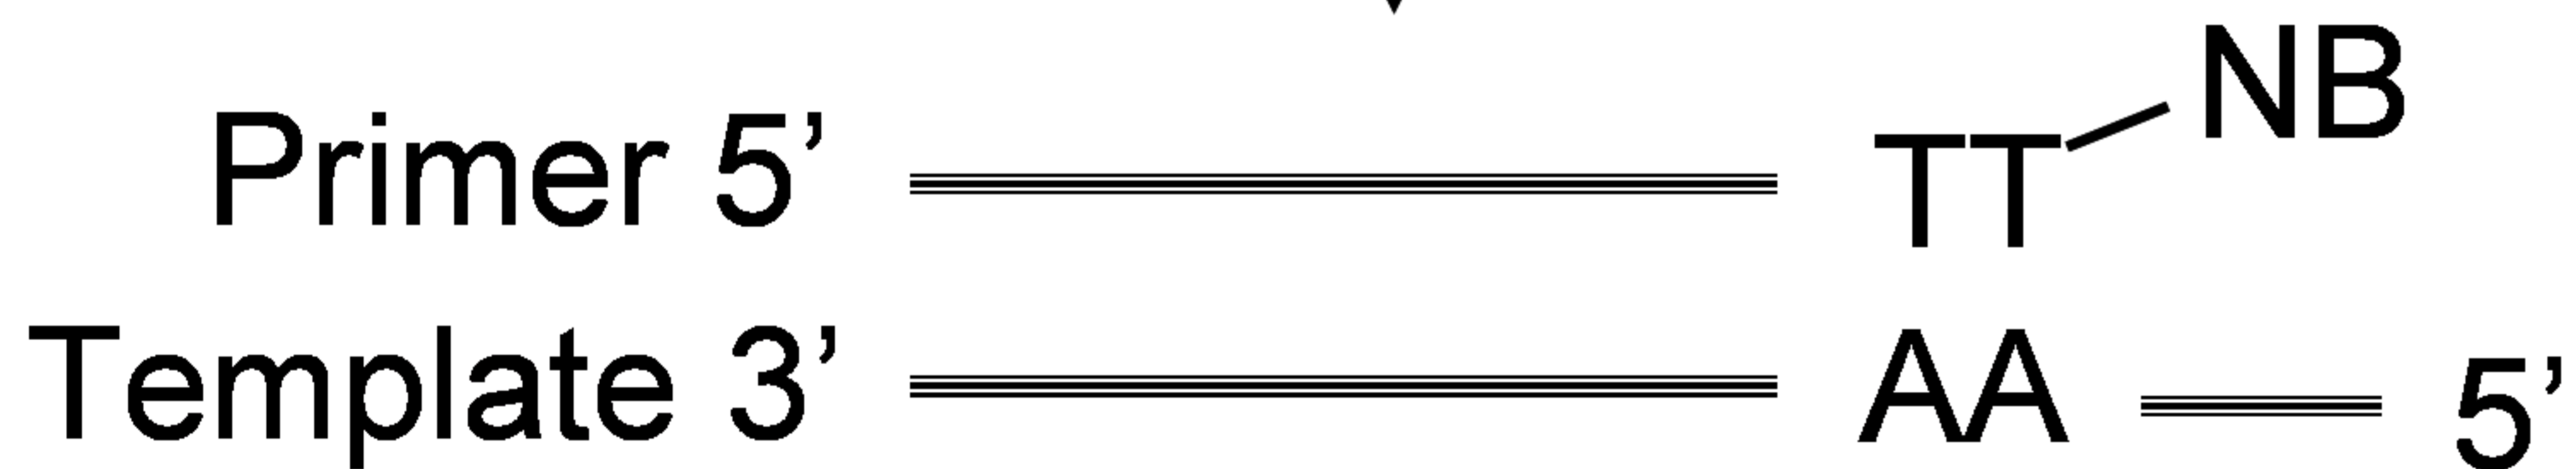

*Photocleavage*

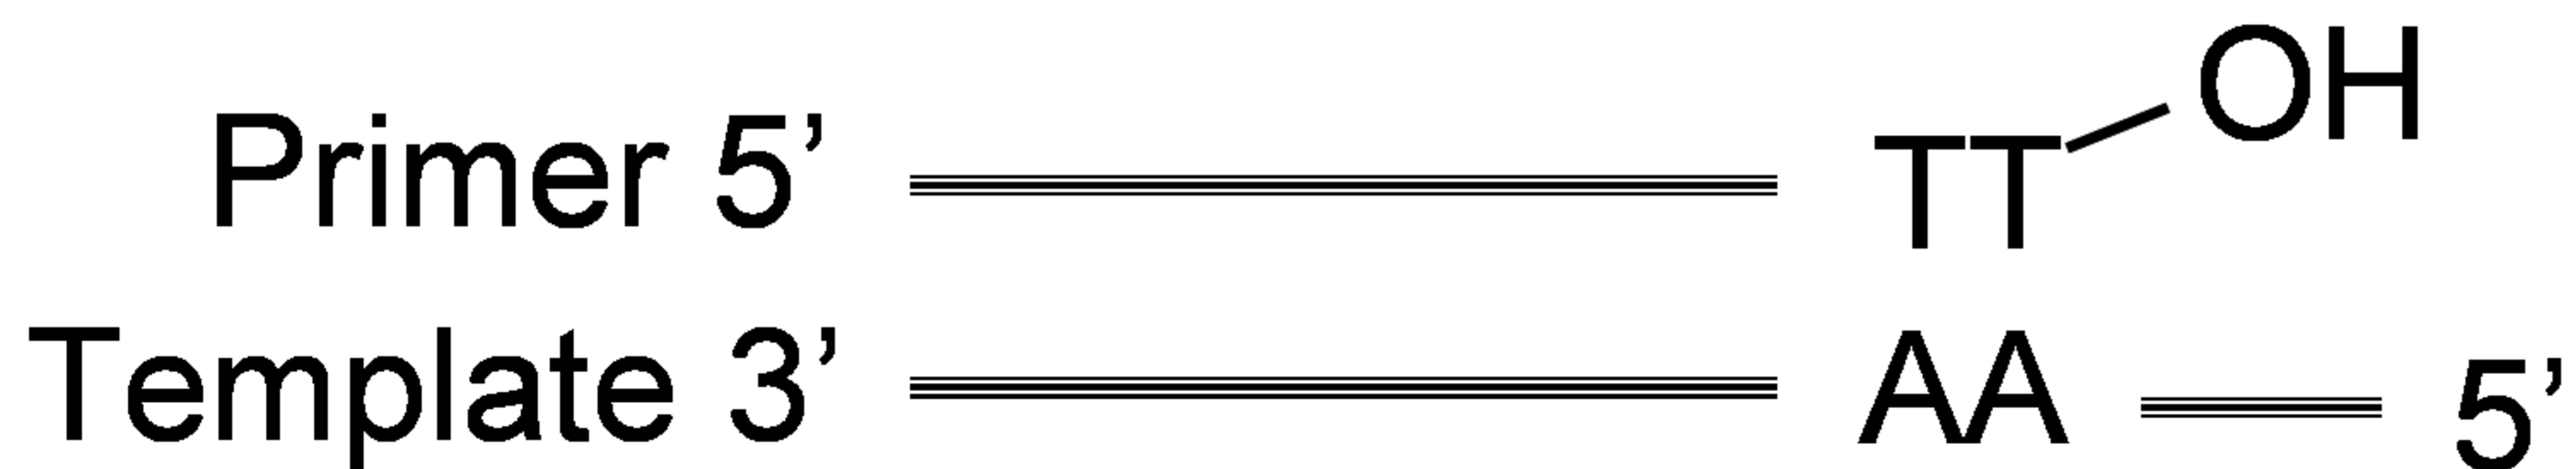

(1)

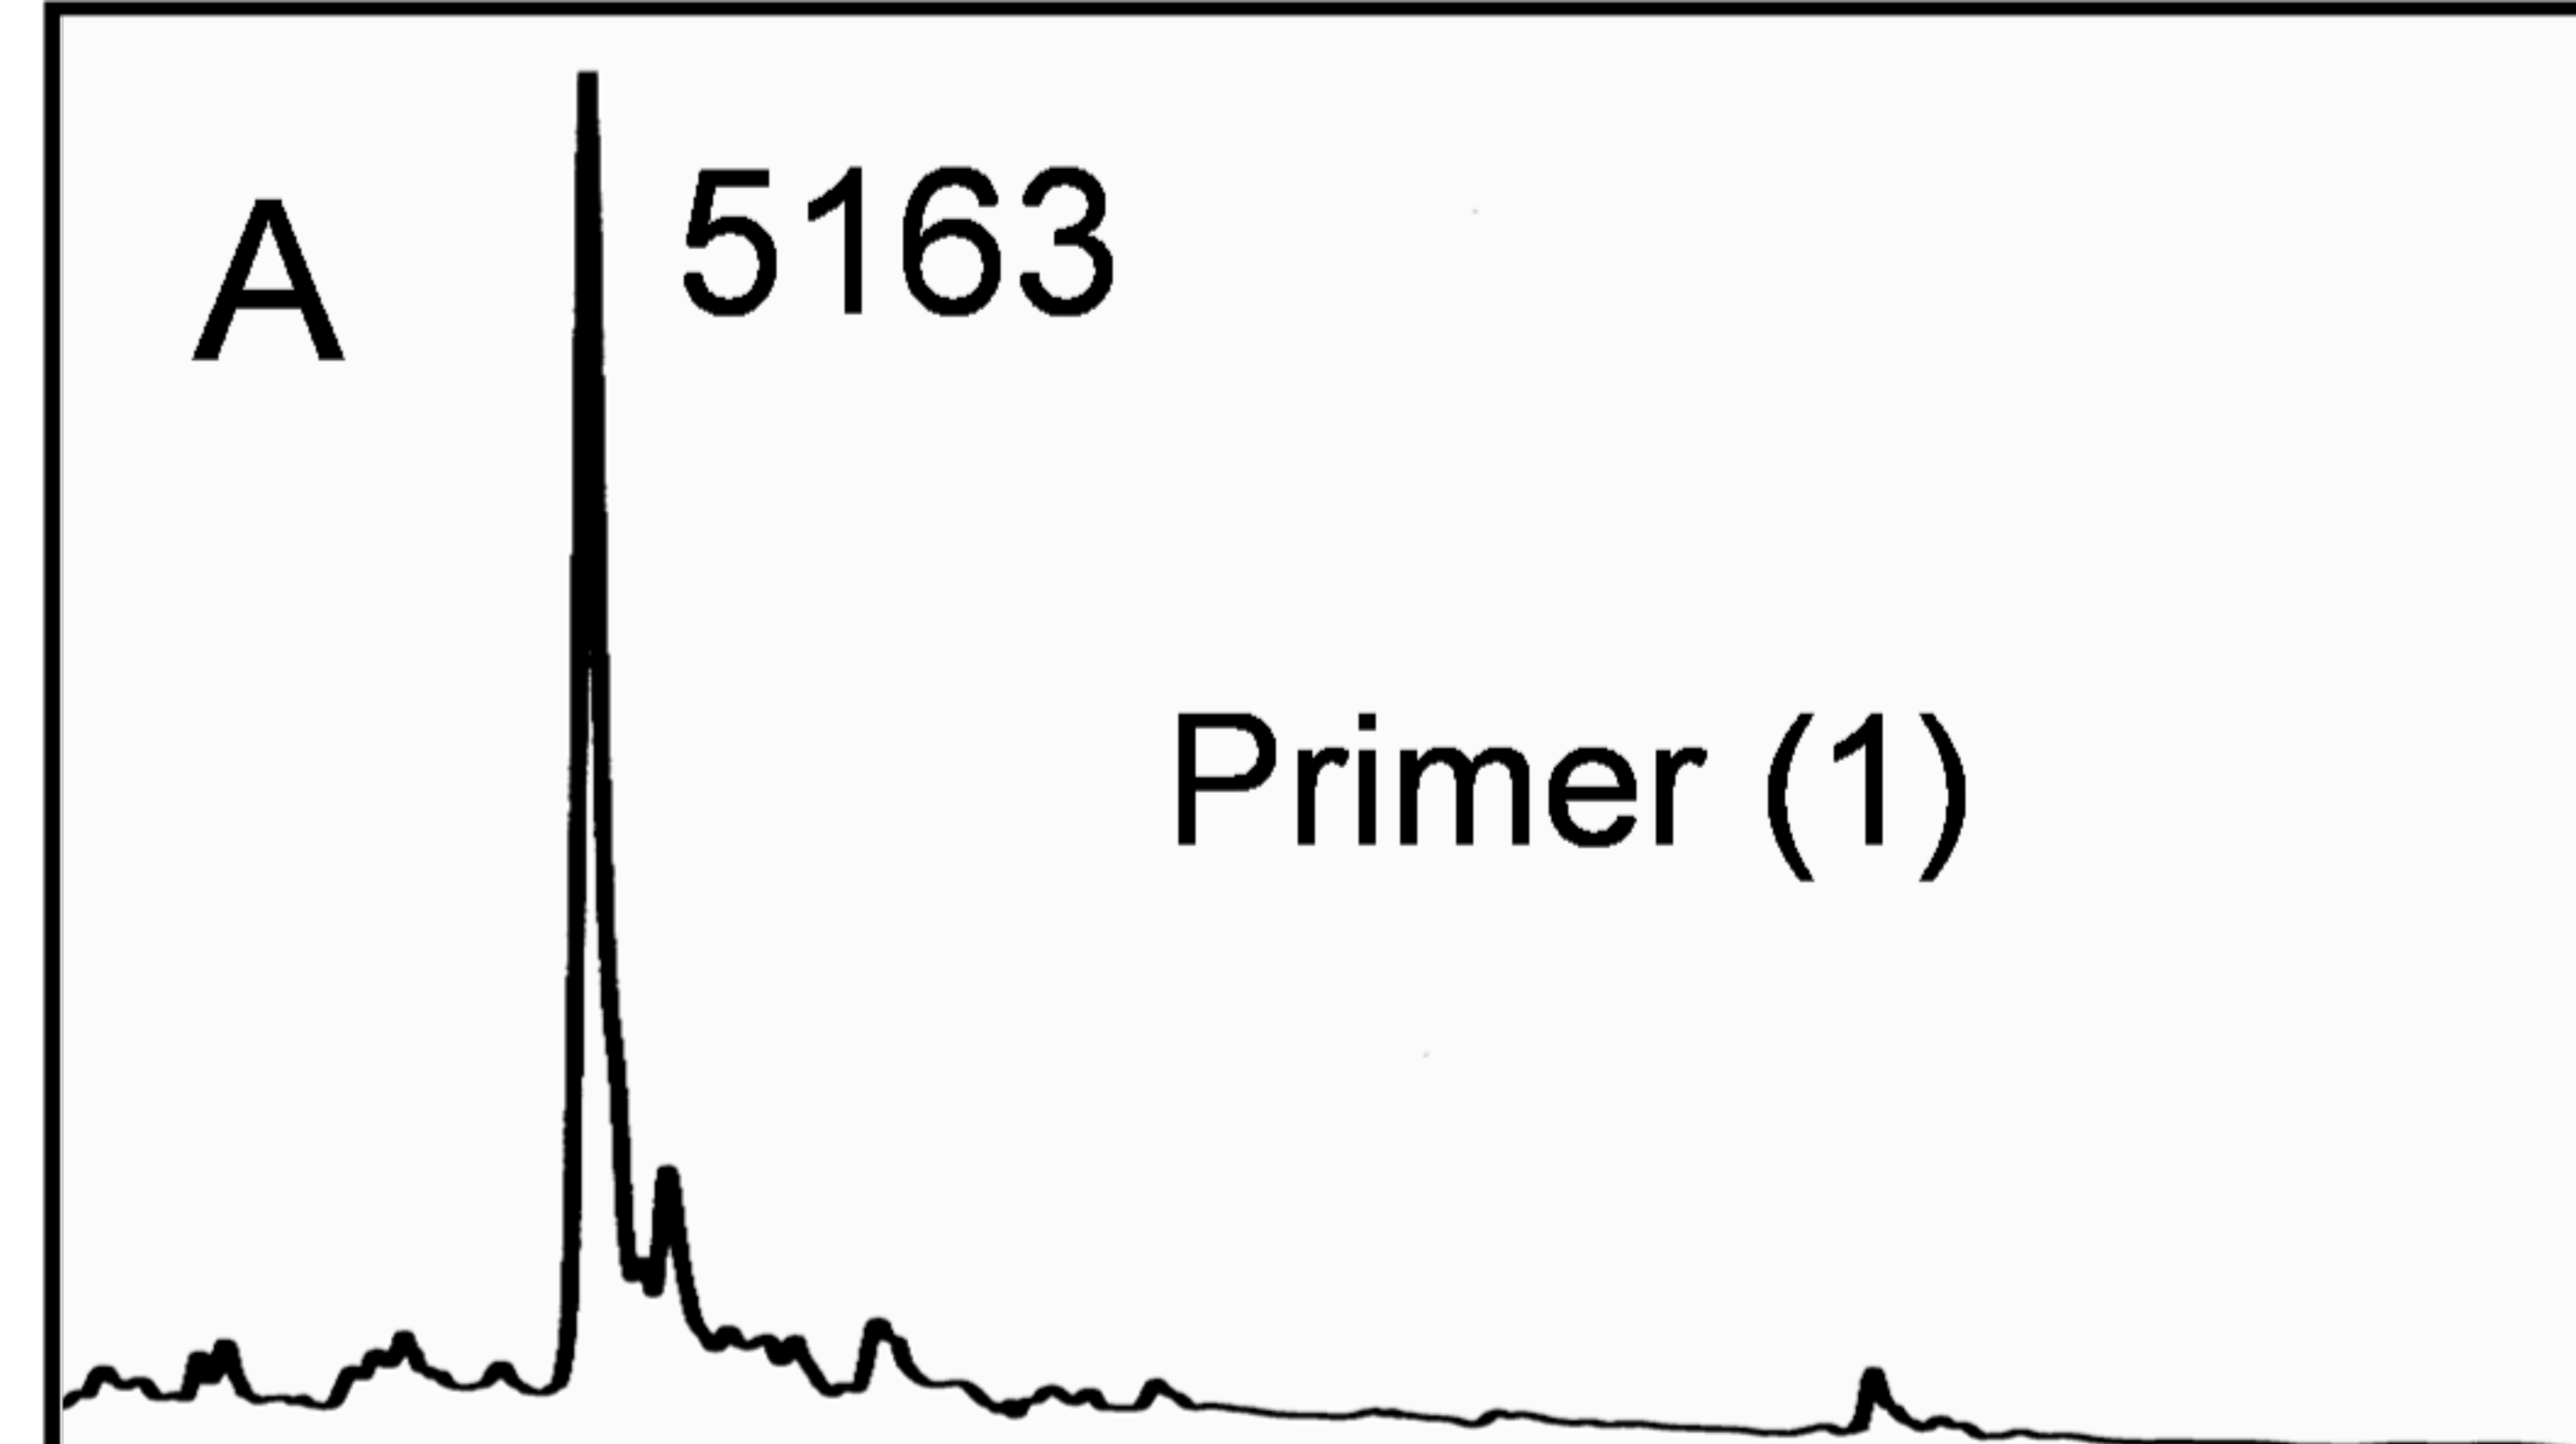

(2)

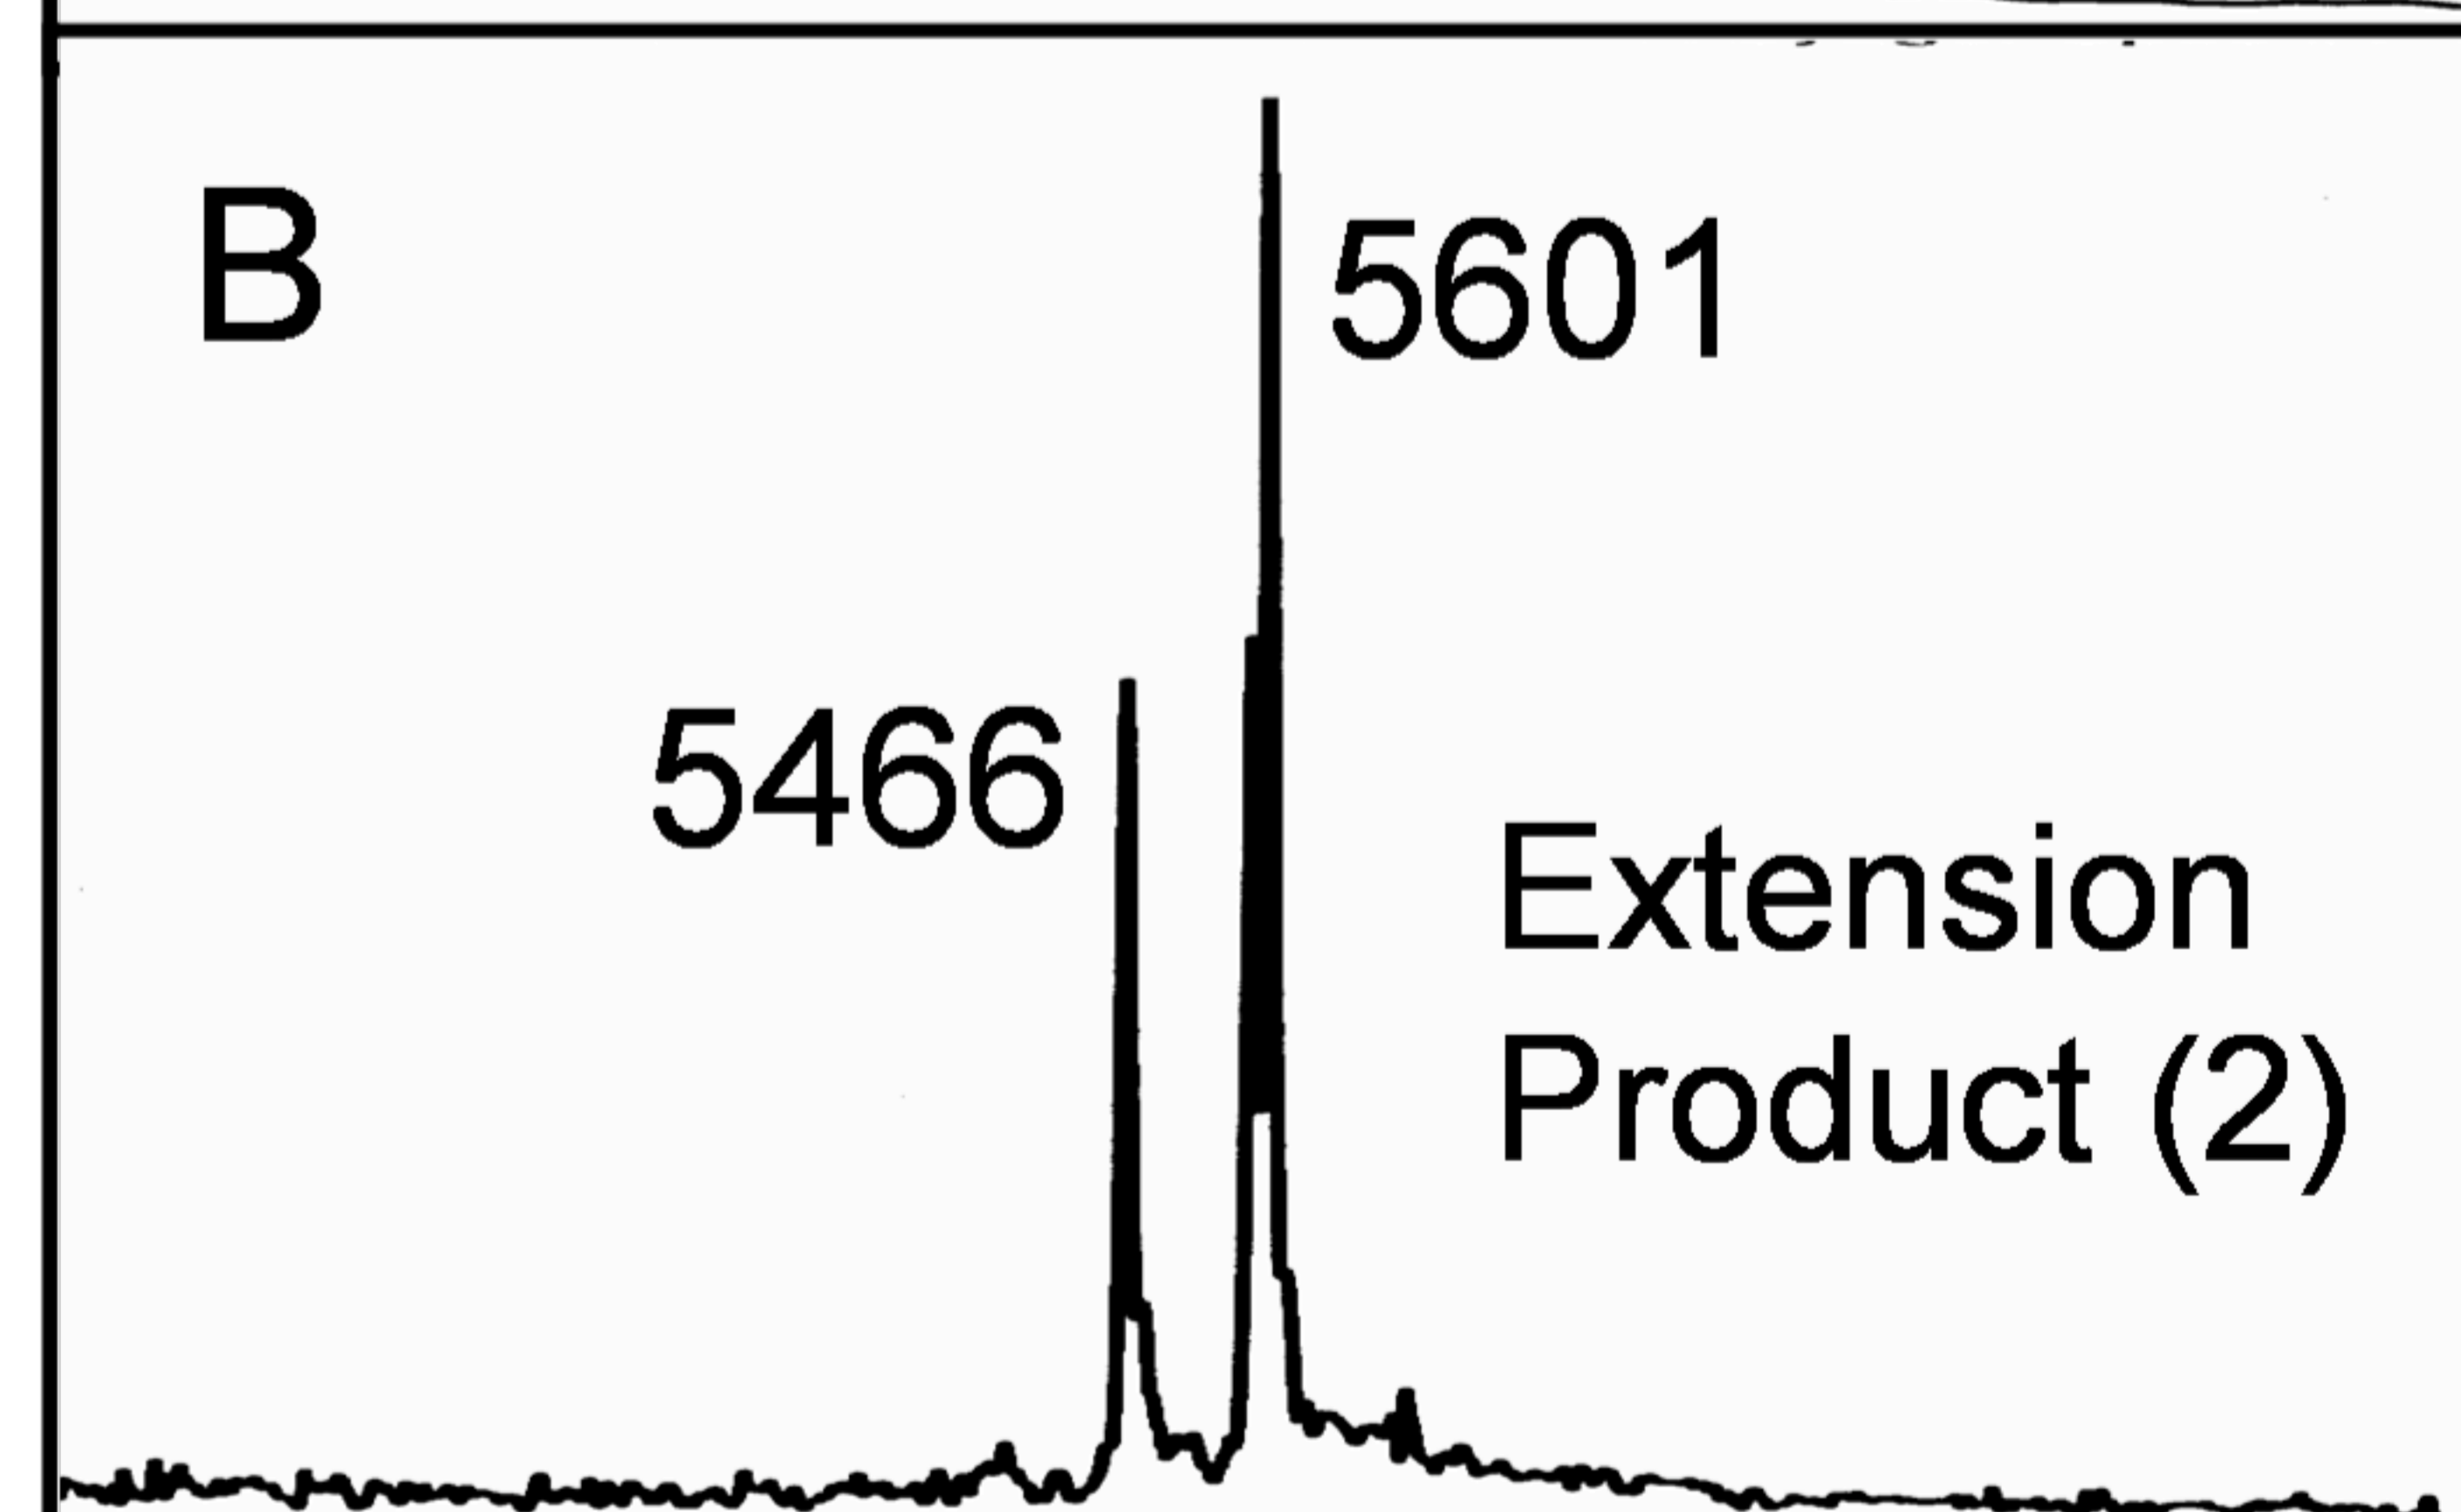

(3)

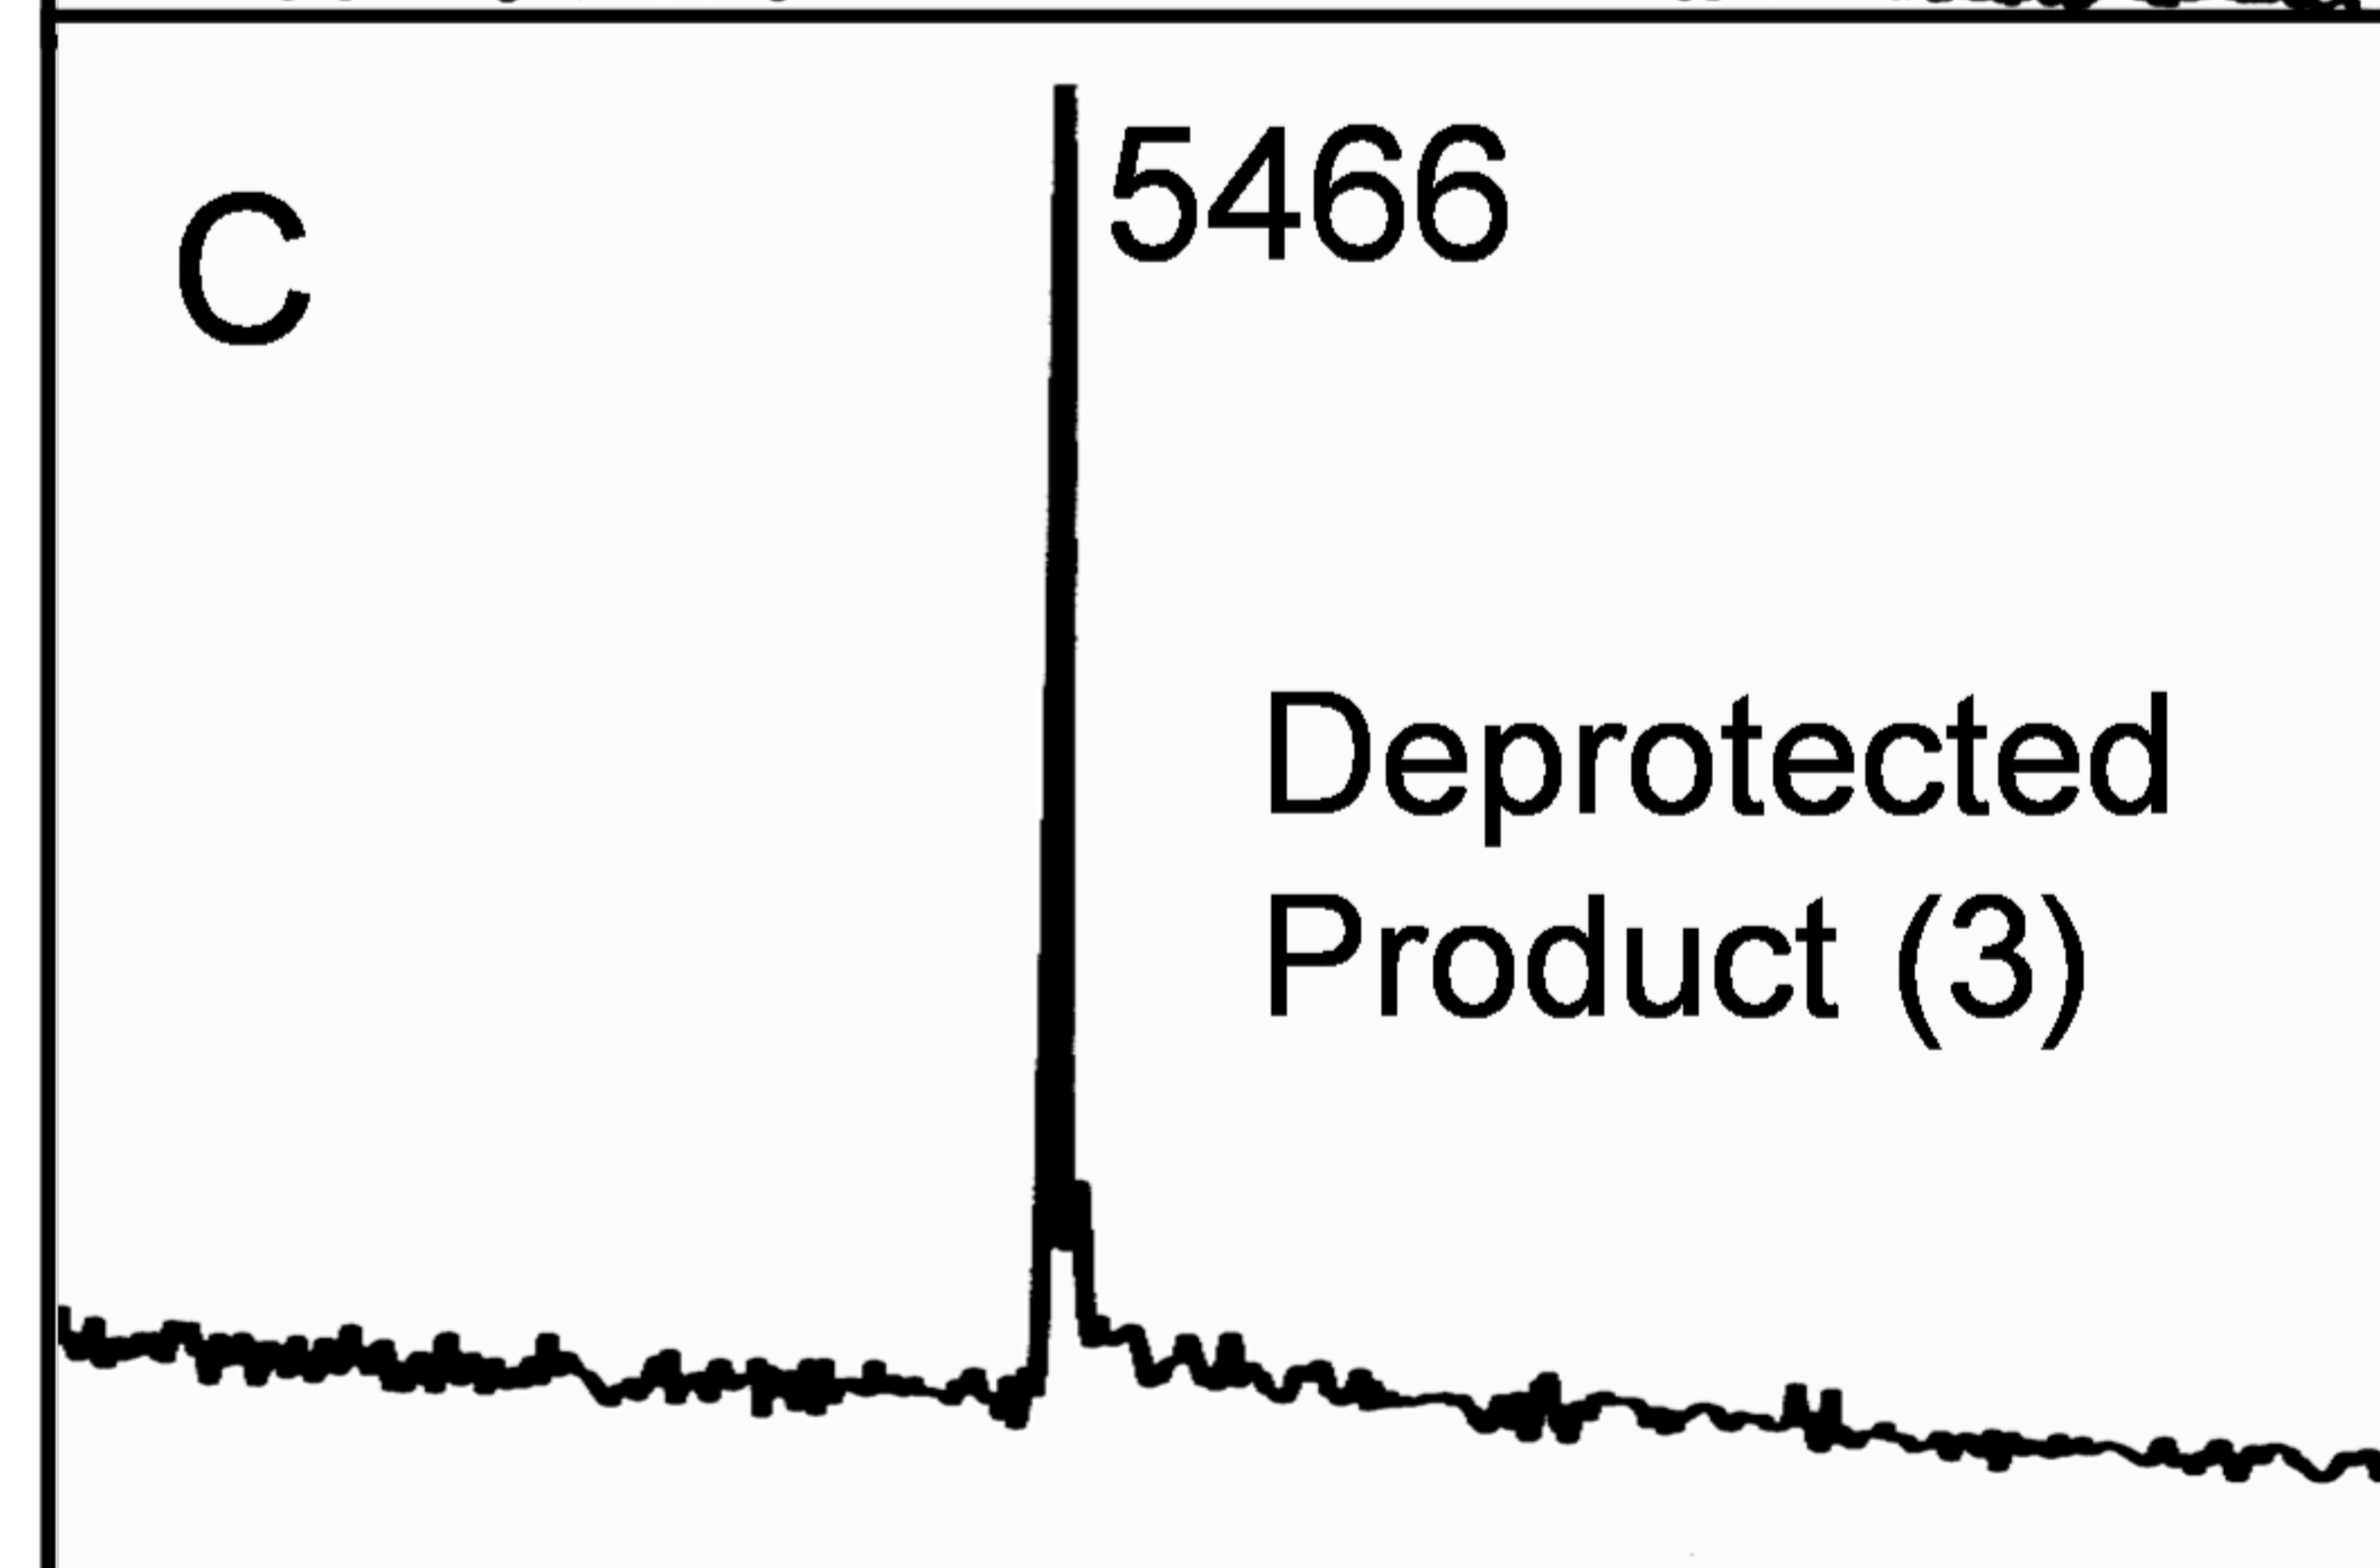

(4)

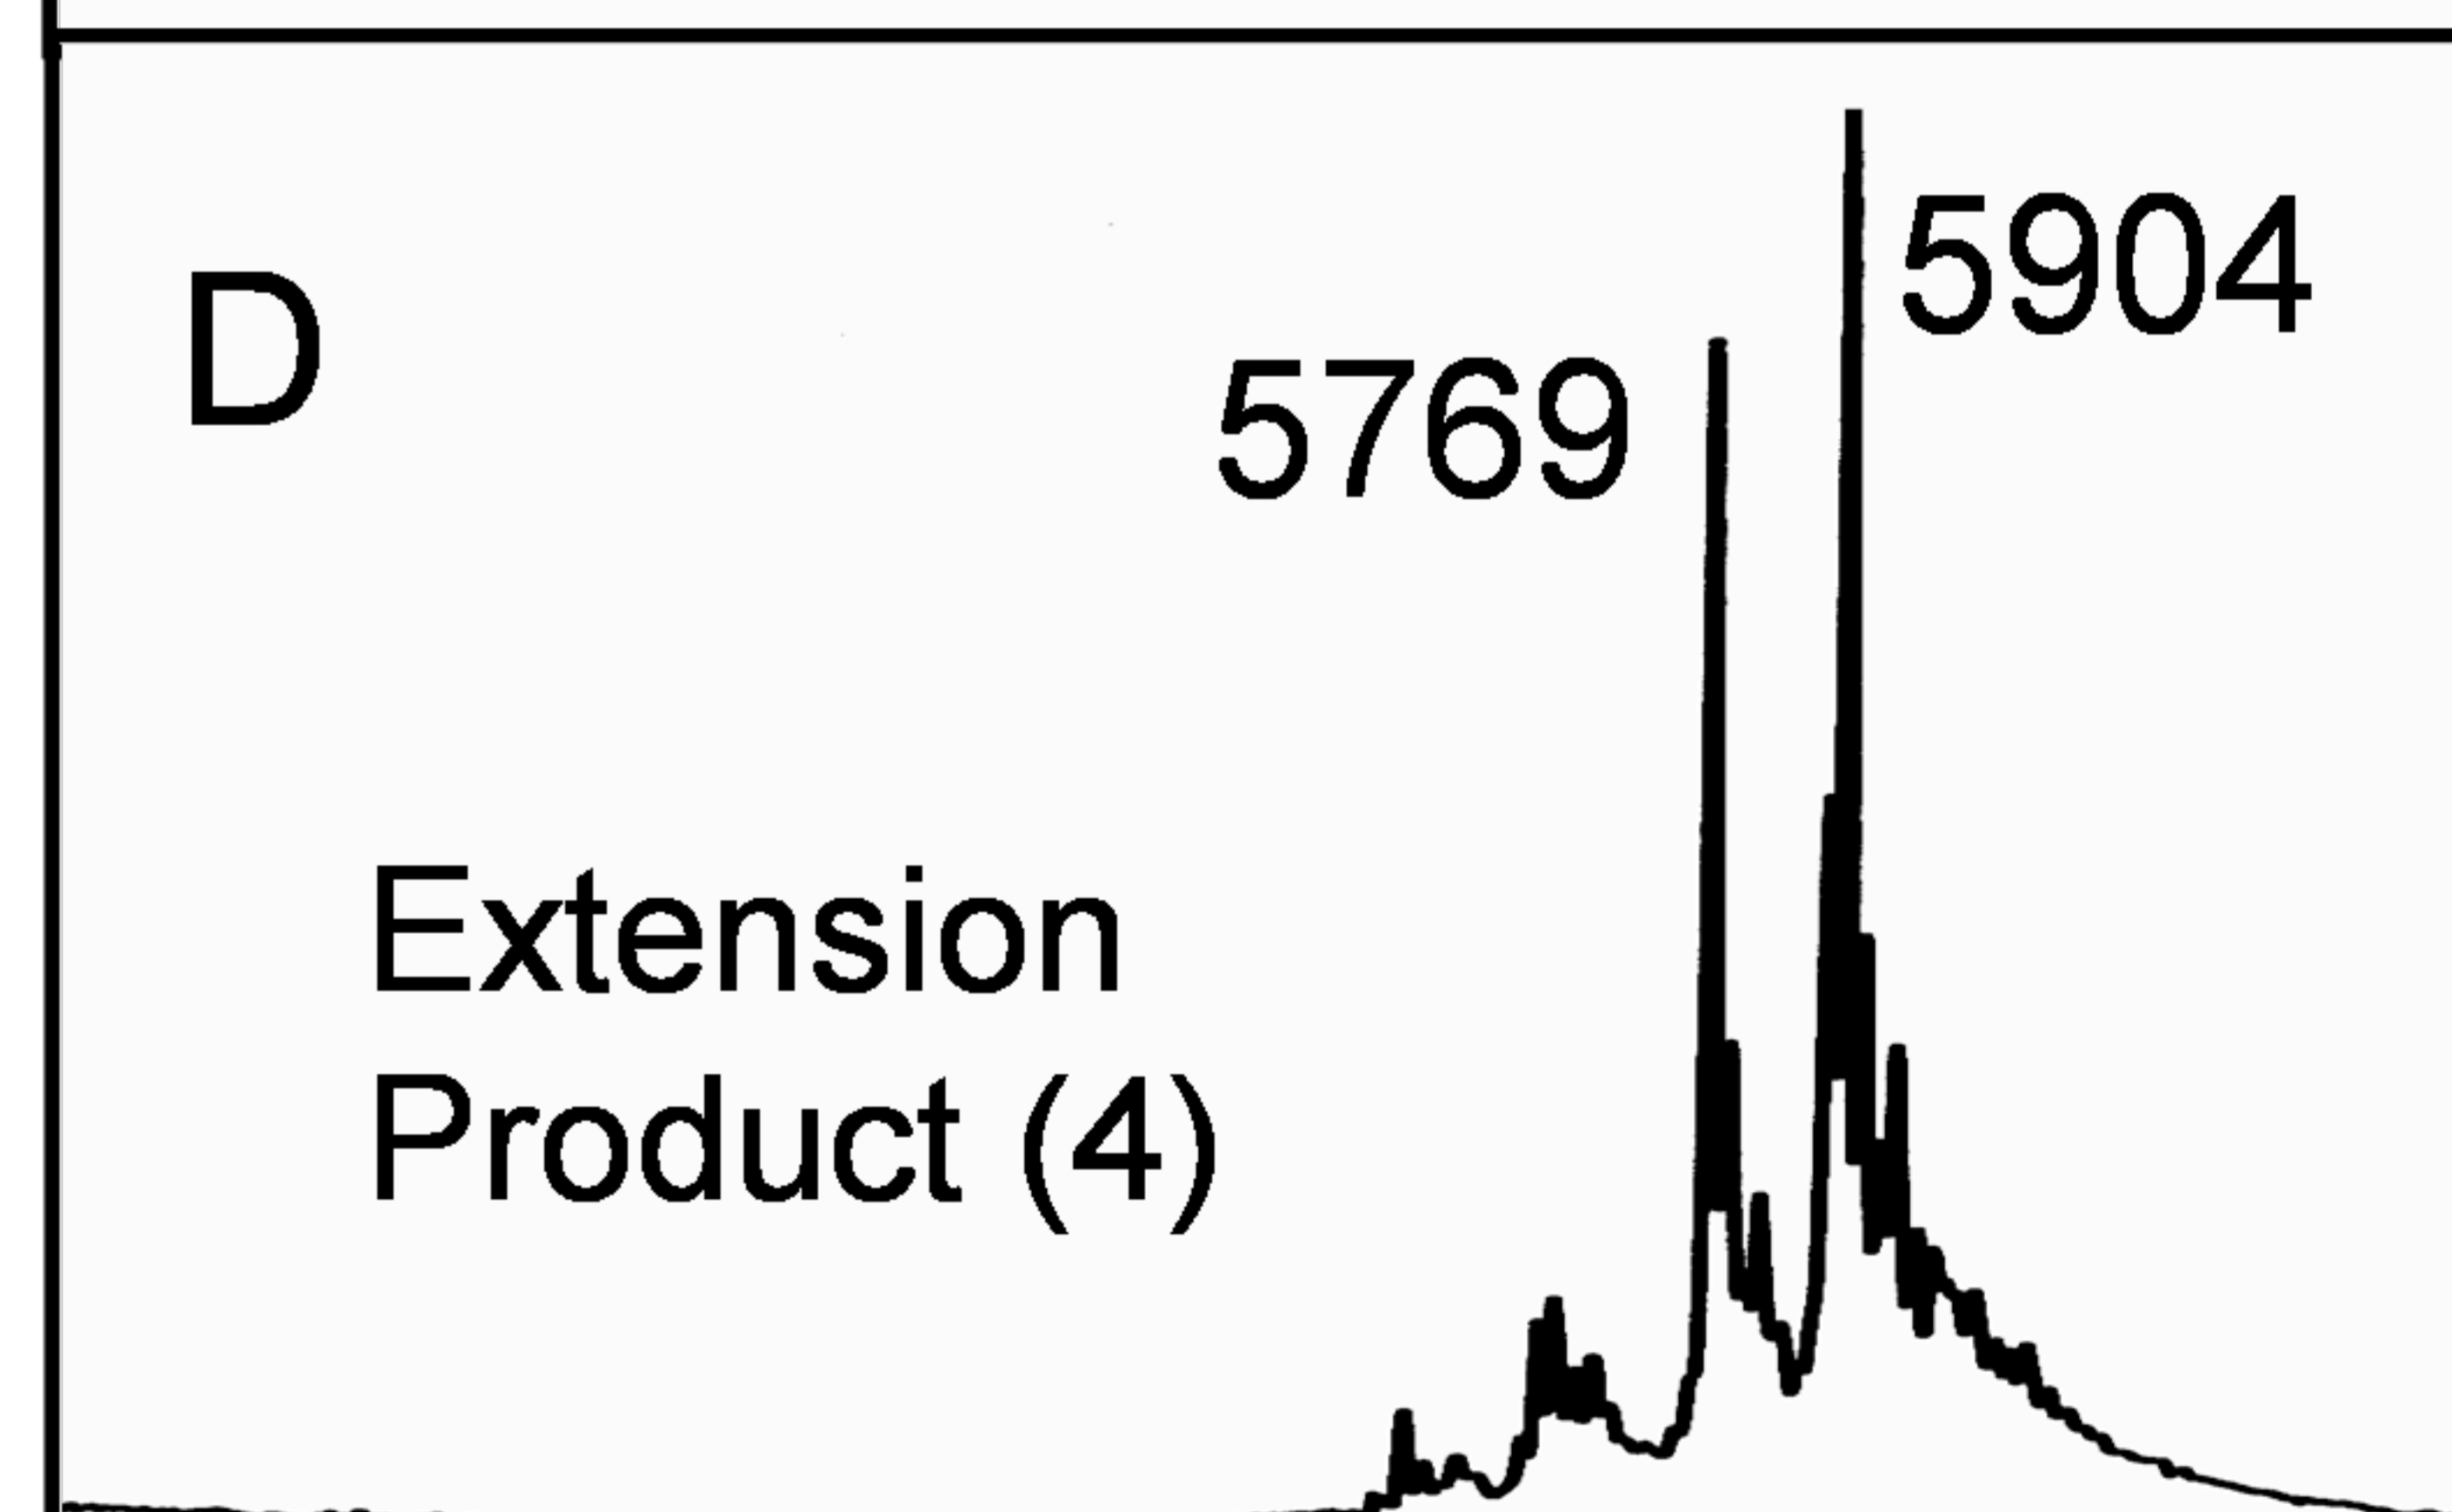

(5)

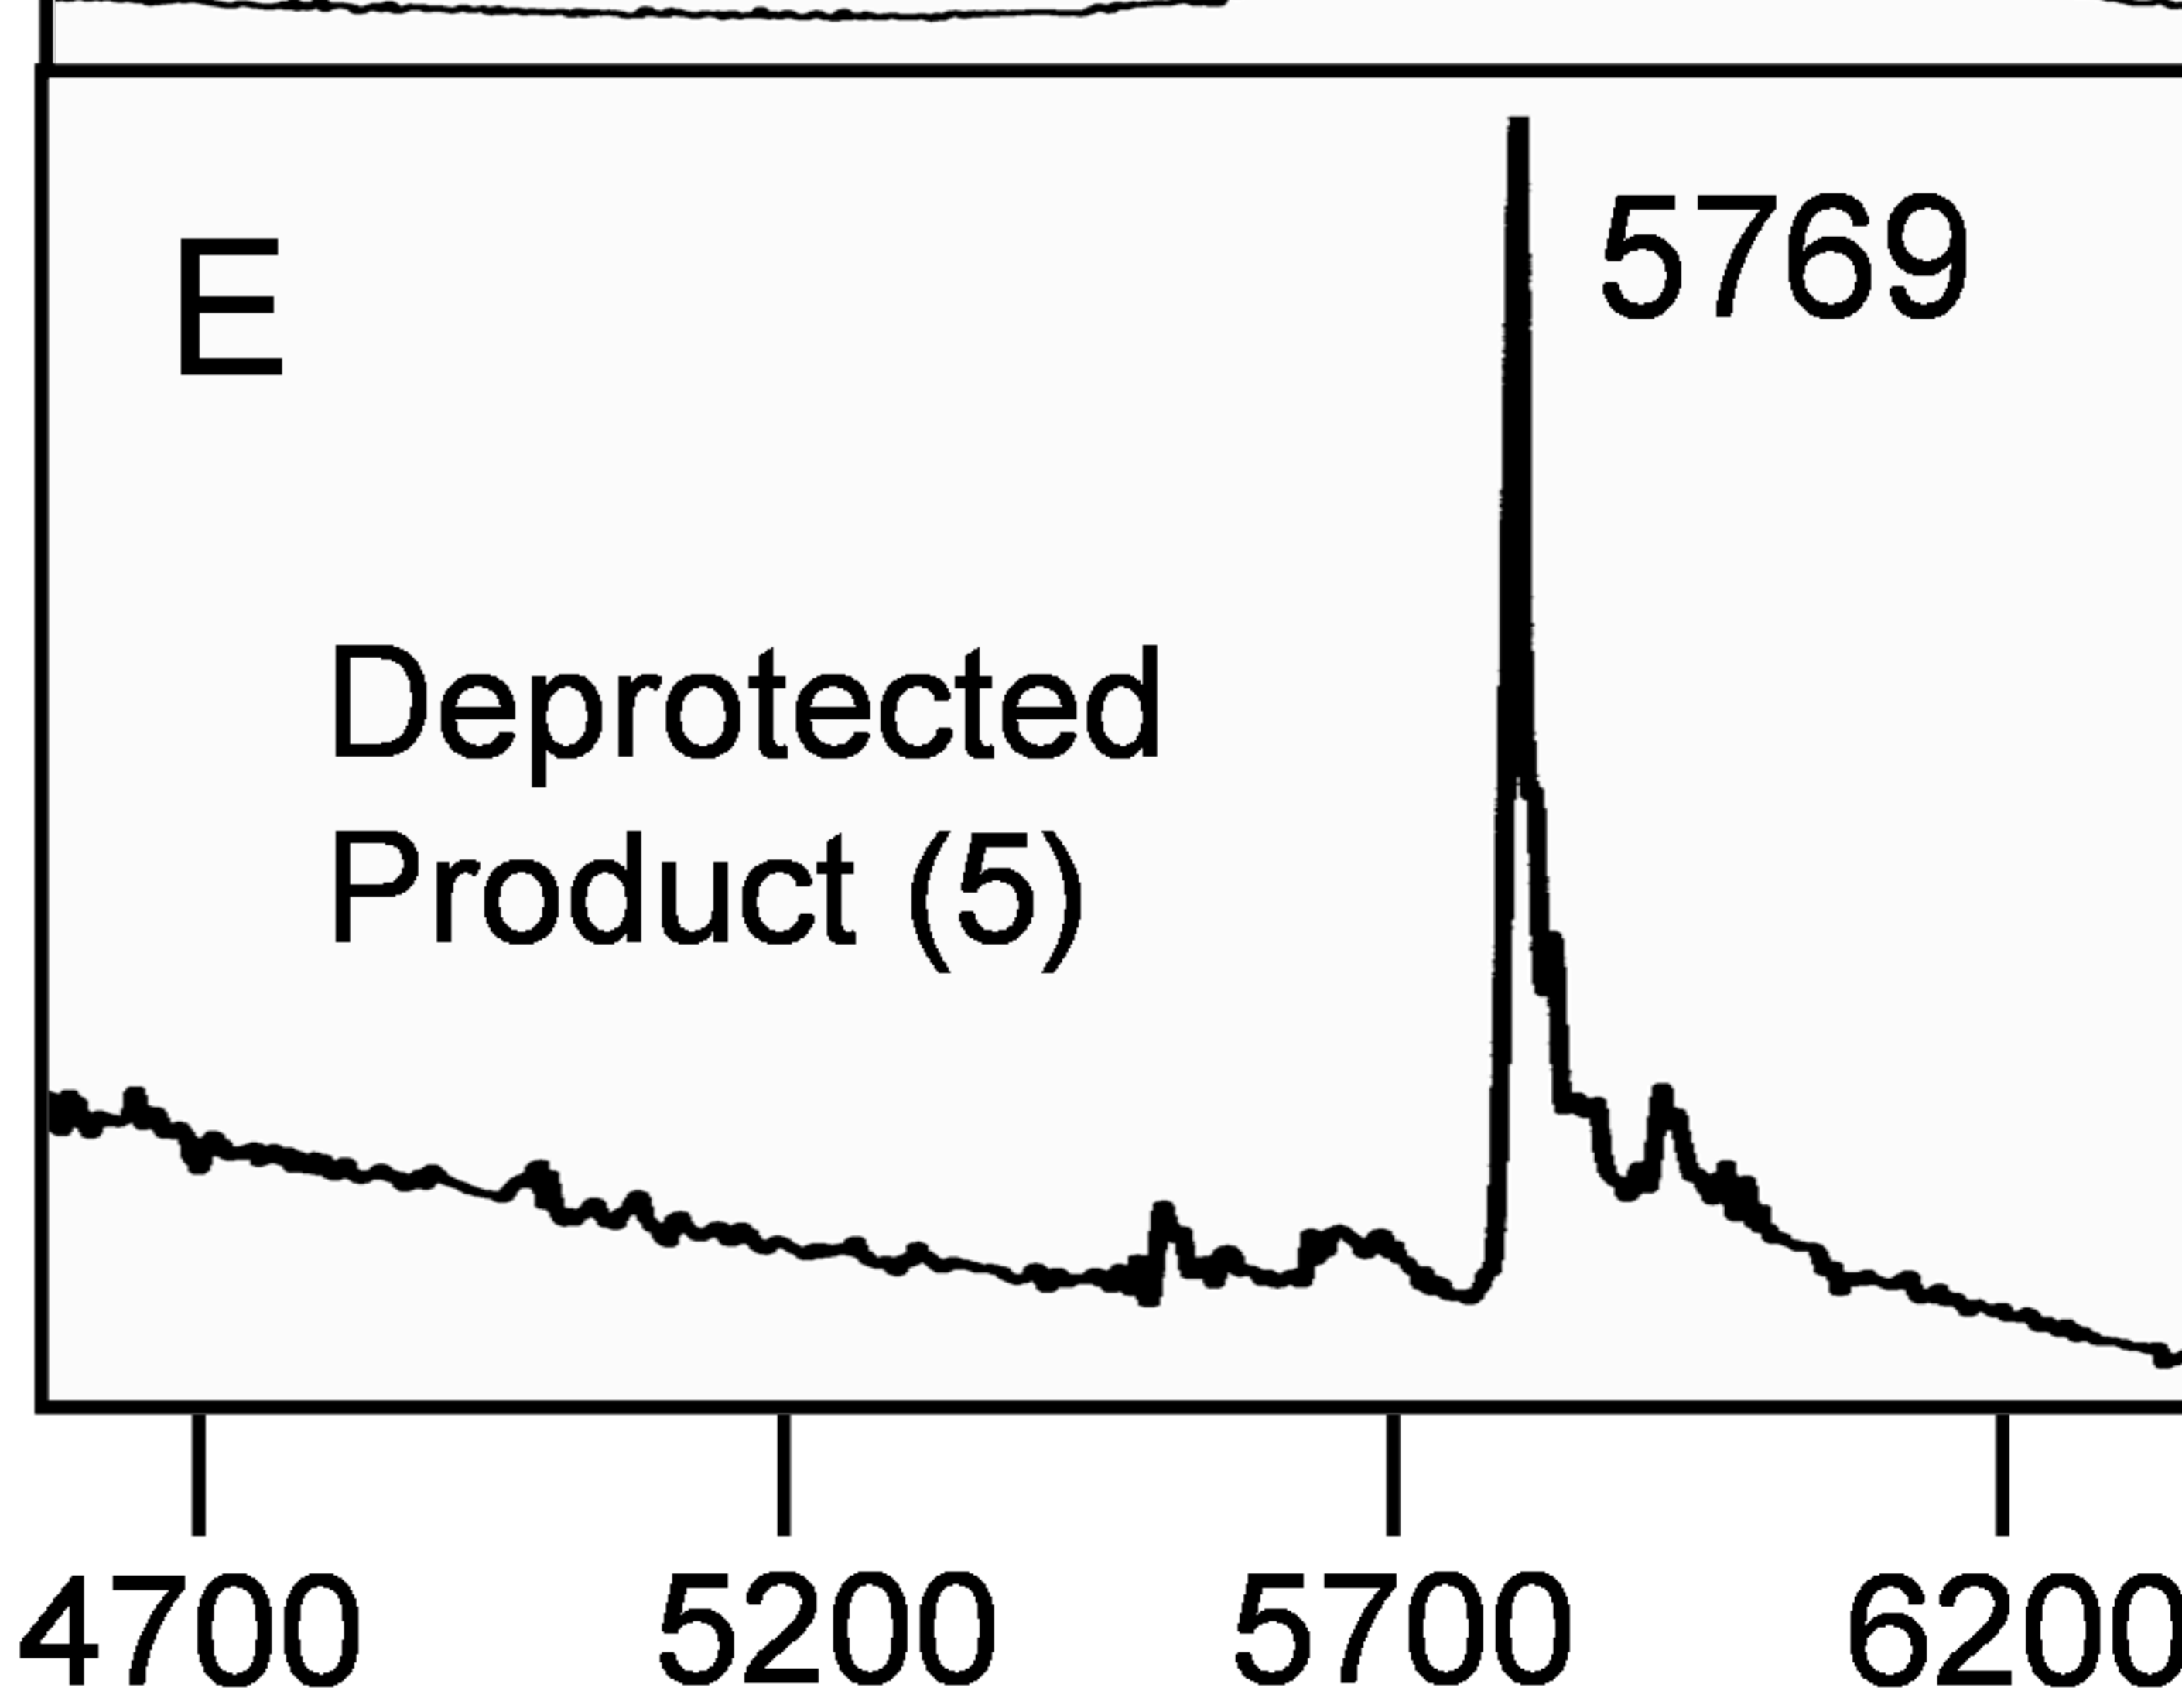

4700 5200 5700 6200

Supplement: pnas_0707495104_1.pdf [file pnas_0707495104_1.pdf]

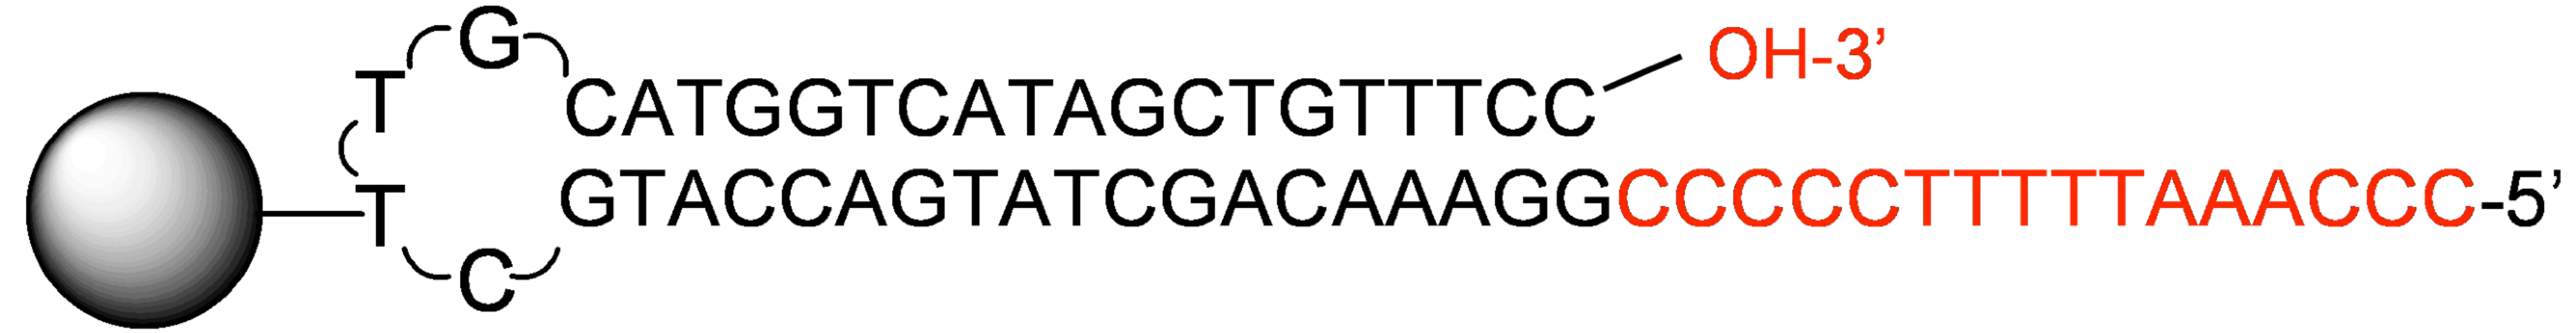

**3'-O-R-dGTP**

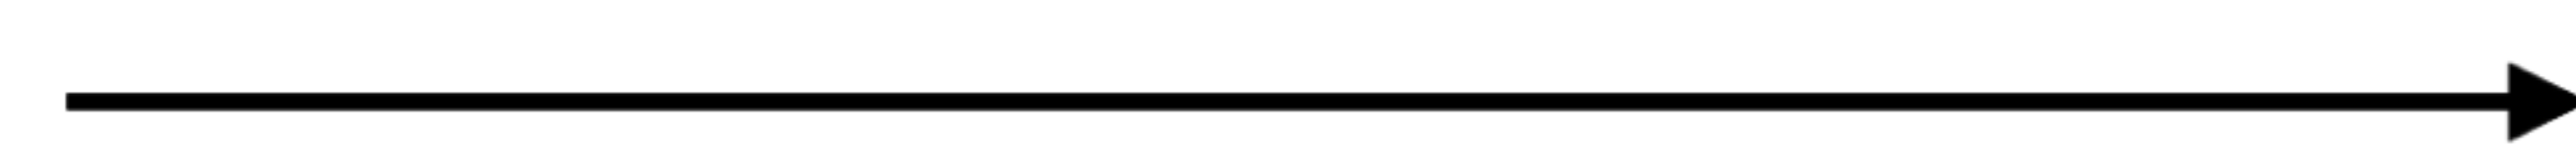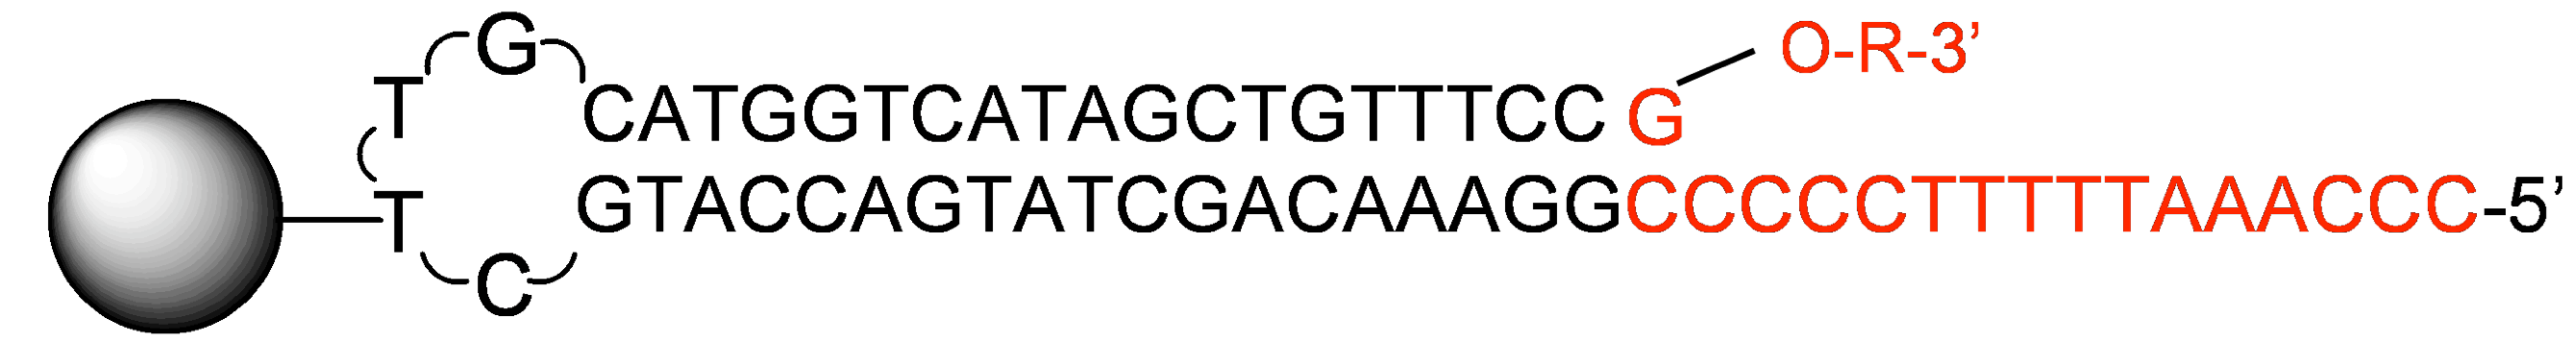

**PPi detection**

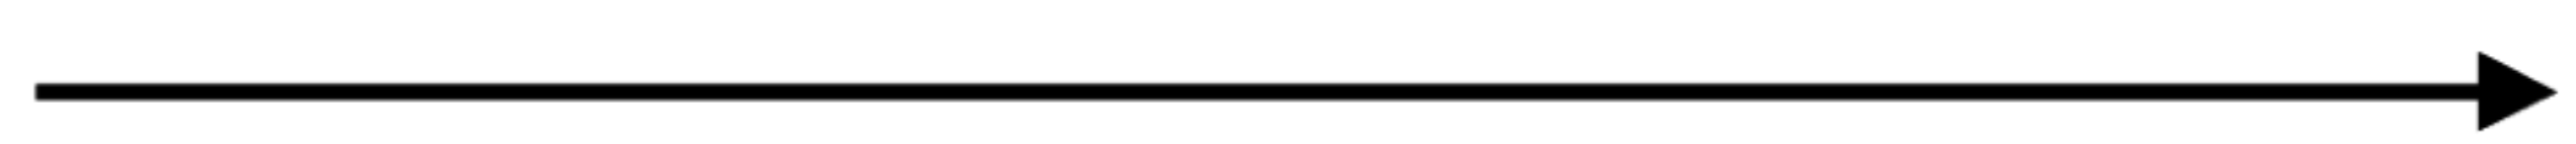

**Deprotection**

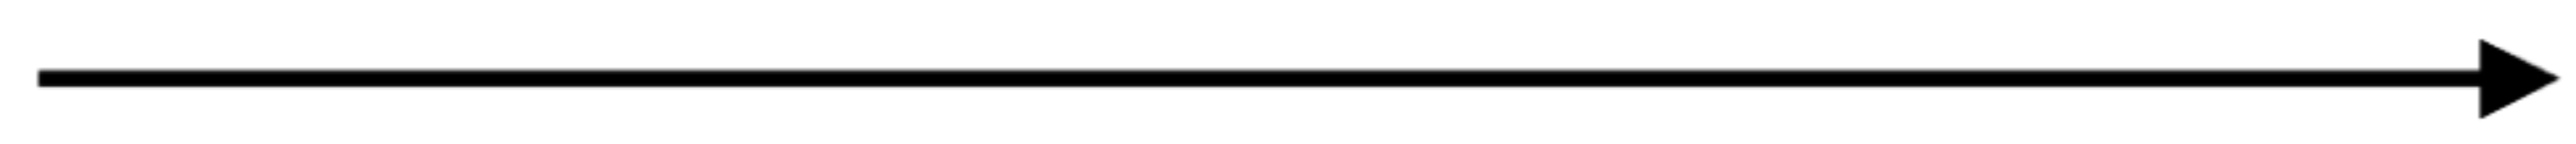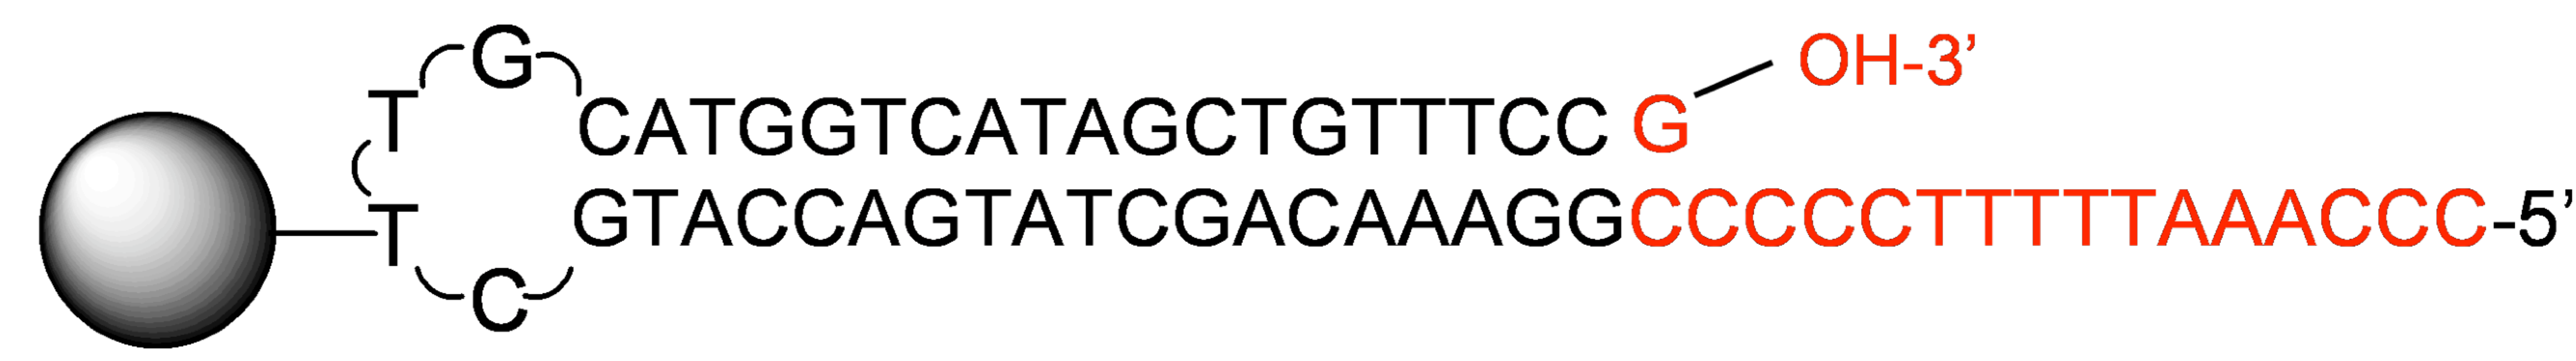

**3'-O-R-dGTP**

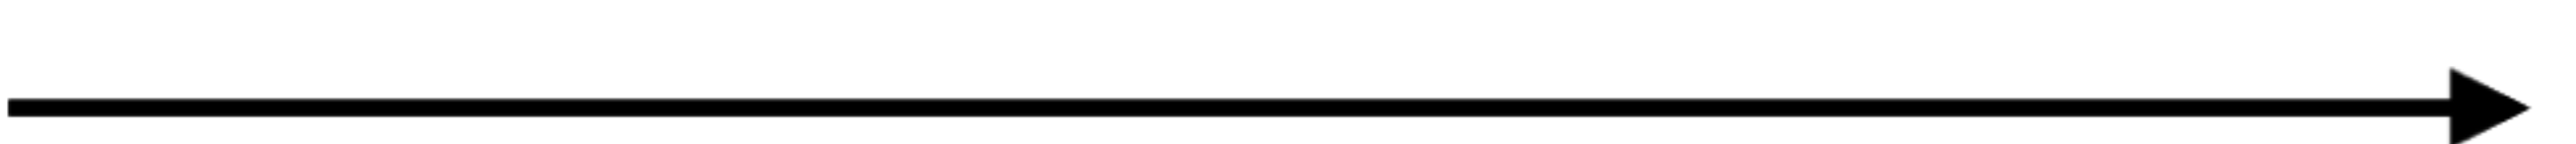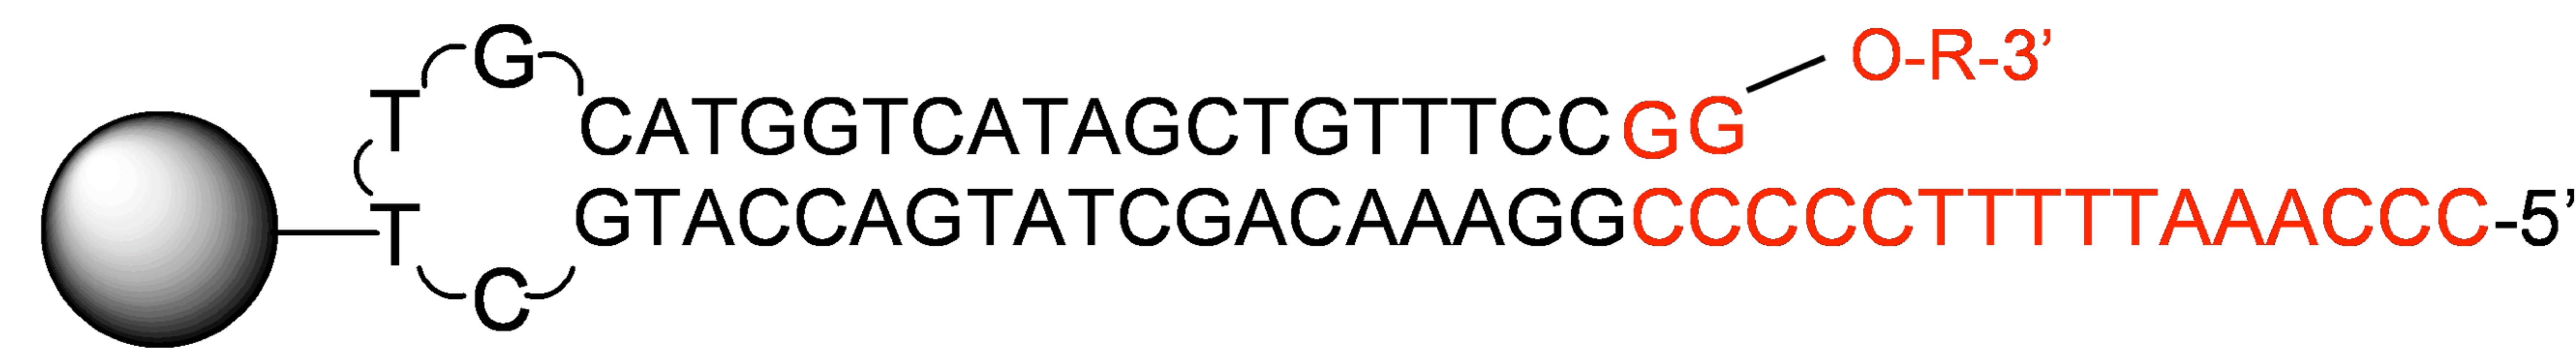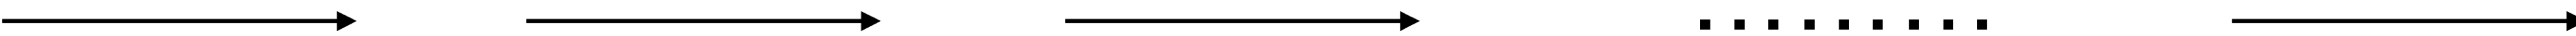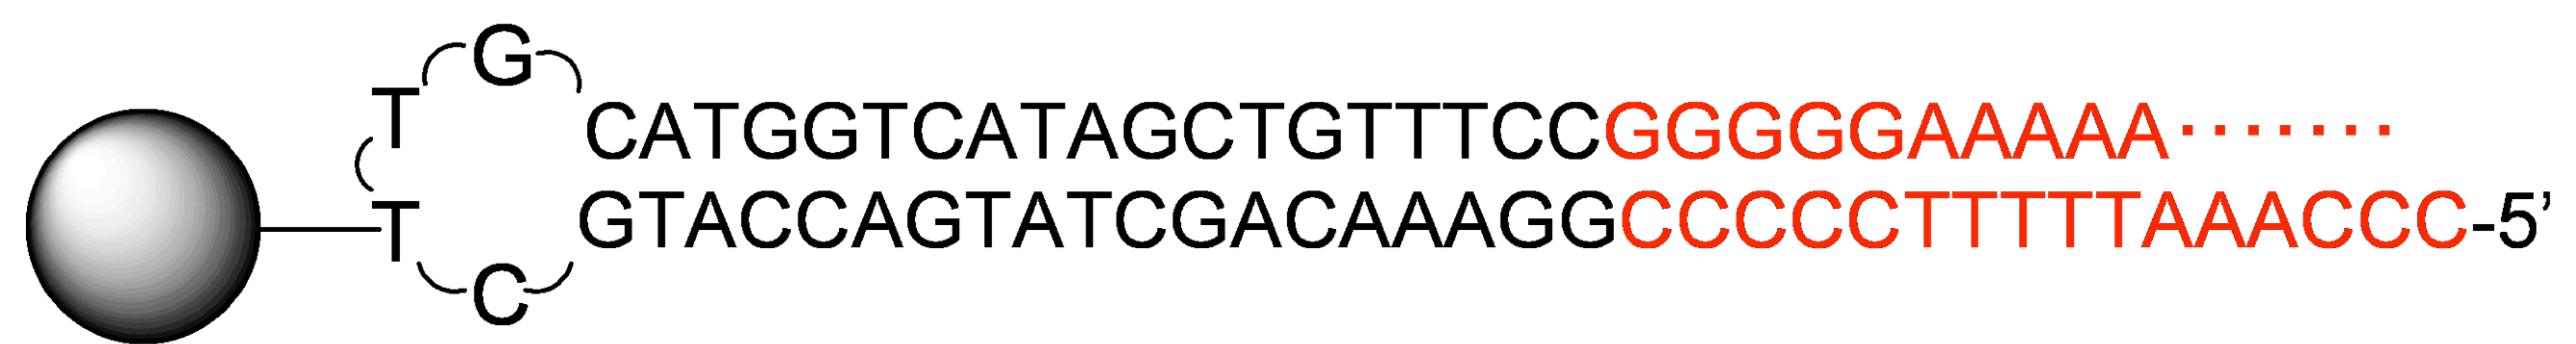

Supplement: pnas_0707495104_2.pdf [file pnas_0707495104_2.pdf]
